# Supplementary material for: Contribution of supervision to the development of advanced practitioners: a qualitative study of pharmacy learners’ and supervisors’ views
Source: PubMed Central journal article supplement — BMJ Open. 2022 Apr 12;12(4):e059026. doi: 10.1136/bmjopen-2021-059026 (PMC9006828; doi:10.1136/bmjopen-2021-059026), 2022-04-12
Supplement: bmjopen-2021-059026.draft_revisions.pdf [file bmjopen-2021-059026.draft_revisions.pdf]

# BMJ Open

BMJ Open is committed to open peer review. As part of this commitment we make the peer review history of every article we publish publicly available.

When an article is published we post the peer reviewers' comments and the authors' responses online. We also post the versions of the paper that were used during peer review. These are the versions that the peer review comments apply to.

The versions of the paper that follow are the versions that were submitted during the peer review process. They are not the versions of record or the final published versions. They should not be cited or distributed as the published version of this manuscript.

BMJ Open is an open access journal and the full, final, typeset and author-corrected version of record of the manuscript is available on our site with no access controls, subscription charges or pay-per-view fees (<http://bmjopen.bmj.com>).

If you have any questions on BMJ Open's open peer review process please email [info.bmjopen@bmj.com](mailto:info.bmjopen@bmj.com)

# BMJ Open

## Contribution of supervision to the development of advanced practitioners: a qualitative study of pharmacy learners' and supervisors' views

|                               |                                                                                                                                                                                                                                                                                                                                                                                                                                                                                                                                                                                                                                                                                                                   |
|-------------------------------|-------------------------------------------------------------------------------------------------------------------------------------------------------------------------------------------------------------------------------------------------------------------------------------------------------------------------------------------------------------------------------------------------------------------------------------------------------------------------------------------------------------------------------------------------------------------------------------------------------------------------------------------------------------------------------------------------------------------|
| Journal:                      | <i>BMJ Open</i>                                                                                                                                                                                                                                                                                                                                                                                                                                                                                                                                                                                                                                                                                                   |
| Manuscript ID                 | bmjopen-2021-059026                                                                                                                                                                                                                                                                                                                                                                                                                                                                                                                                                                                                                                                                                               |
| Article Type:                 | Original research                                                                                                                                                                                                                                                                                                                                                                                                                                                                                                                                                                                                                                                                                                 |
| Date Submitted by the Author: | 05-Nov-2021                                                                                                                                                                                                                                                                                                                                                                                                                                                                                                                                                                                                                                                                                                       |
| Complete List of Authors:     | Hindi, Ali; The University of Manchester, Centre for Pharmacy Workforce Studies, Division of Pharmacy and Optometry<br>Willis, Sarah; The University of Manchester<br>Astbury, Jayne; The University of Manchester<br>Fenton, Catherine; ICF Consulting Services<br>Stearns, Selma; ICF Consulting Services<br>Moss, Aidan; ICF Consulting Services<br>Jacobs, Sally; The University of Manchester Faculty of Biology Medicine and Health<br>McDermott, Imelda; University of Manchester, Centre for Primary Care<br>Seston, Elizabeth; The University of Manchester<br>Schafheutle, Ellen; The University of Manchester, Division of Pharmacy, School of Health Sciences, Faculty of Biology Medicine and Health |
| Keywords:                     | EDUCATION & TRAINING (see Medical Education & Training), Health policy < HEALTH SERVICES ADMINISTRATION & MANAGEMENT, PRIMARY CARE, CLINICAL PHARMACOLOGY                                                                                                                                                                                                                                                                                                                                                                                                                                                                                                                                                         |
|                               |                                                                                                                                                                                                                                                                                                                                                                                                                                                                                                                                                                                                                                                                                                                   |

SCHOLARONE™  
Manuscripts

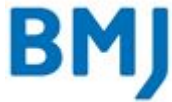

I, the Submitting Author has the right to grant and does grant on behalf of all authors of the Work (as defined in the below author licence), an exclusive licence and/or a non-exclusive licence for contributions from authors who are: i) UK Crown employees; ii) where BMJ has agreed a CC-BY licence shall apply, and/or iii) in accordance with the terms applicable for US Federal Government officers or employees acting as part of their official duties; on a worldwide, perpetual, irrevocable, royalty-free basis to BMJ Publishing Group Ltd ("BMJ") its licensees and where the relevant Journal is co-owned by BMJ to the co-owners of the Journal, to publish the Work in this journal and any other BMJ products and to exploit all rights, as set out in our [licence](#).

The Submitting Author accepts and understands that any supply made under these terms is made by BMJ to the Submitting Author unless you are acting as an employee on behalf of your employer or a postgraduate student of an affiliated institution which is paying any applicable article publishing charge ("APC") for Open Access articles. Where the Submitting Author wishes to make the Work available on an Open Access basis (and intends to pay the relevant APC), the terms of reuse of such Open Access shall be governed by a Creative Commons licence – details of these licences and which [Creative Commons](#) licence will apply to this Work are set out in our licence referred to above.

Other than as permitted in any relevant BMJ Author's Self Archiving Policies, I confirm this Work has not been accepted for publication elsewhere, is not being considered for publication elsewhere and does not duplicate material already published. I confirm all authors consent to publication of this Work and authorise the granting of this licence.

1  
2  
3  
4  
5 **Contribution of supervision to the development of advanced practitioners: a**  
6 **qualitative study of pharmacy learners' and supervisors' views**  
7

8  
9 **Authors:**

10 Ali M.K. Hindi\* (PhD), Sarah Willis (PhD), Jayne Astbury (PhD), Catherine Fenton  
11 (MSc), Selma Stearns (MSc), Sally Jacobs (PhD), Imelda Mcdermott (PhD), Aidan  
12 Moss (MSc), Elizabeth Seston (PhD), Ellen I. Schafheutle (PhD)  
13  
14  
15

16 **\*Author for correspondence**

17 **Full postal address for corresponding author:**

18 Centre for Pharmacy Workforce Studies, Division of Pharmacy and Optometry; School  
19 of Health Sciences; Faculty of Biology, Medicine and Health, The University of  
20 Manchester, Oxford Road, Manchester M13 9PT, United Kingdom  
21  
22

23 Email: [ali.hindi@manchester.ac.uk](mailto:ali.hindi@manchester.ac.uk)  
24  
25  
26  
27  
28  
29  
30  
31  
32  
33  
34  
35  
36  
37  
38  
39  
40  
41  
42  
43  
44  
45  
46  
47  
48  
49  
50  
51  
52  
53  
54  
55  
56  
57  
58  
59  
60

## Abstract

**Objective:** To apply educational theory to explore how supervision can contribute to the development of advanced practitioners using the example of several post-registration primary care training pathways for pharmacy professionals (pharmacists and pharmacy technicians)

**Design:** Qualitative semi-structured telephone interviews applying Billet's theory of workplace pedagogy for interpretation.

**Setting:** England

**Participants:** Forty-seven learners and ten supervisors

**Primary outcome:** The contribution of clinical (CS) and educational supervision (ES) to the development of advanced practitioners in primary care.

### Results:

Findings were mapped against components of Billet's theory to provide insights into the role of supervision in developing advanced practitioners. Key elements for effective supervision included: supporting learners to identify their learning needs (ES), guiding learners in everyday work activities (CS), combination of regular pre-arranged face-to-face meetings and ad hoc contact when needed (CS), along with ongoing support as learners progressed through a learning pathway (ES).

Clinical supervisors supported learners to develop proficiency and confidence in translating and applying the knowledge and skills they were gaining into practice. Learners benefitted from having clinical supervisors in the workplace with good understanding and experience of working in the setting, as well as receiving clinical supervision from different types of health care professionals. Educational supervisors supported learners to identify their learning needs and the requirements of the learning pathway, and then as an ongoing available source of support as they progressed through a pathway. Educational supervisors also filled in some of the gaps where there was a lack of local clinical supervision, and in settings like community pharmacy where pharmacist learners did not have access to any clinical supervision.

**Conclusions:** This study drew out important elements which contributed to effective supervision of pharmacy advanced practitioners. Findings can inform the education and training of advanced practitioners from different professions to support healthcare workforce development in different healthcare settings.

### Strengths and limitations of this study

- This is the first study to apply Billet's theory of workplace pedagogy as an interpretive framework to understand the mechanisms facilitating effective supervision of advanced practitioners in new and changing primary care settings, with pharmacy professionals as an exemplar.
- Triangulating views of learners and supervisors from different primary care learning pathways helped gather insights into the role of clinical and educational supervision across the board.
- Participants volunteered to take part in this study which increased the potential of self-selection, self-reporting, social desirability and recall bias.
- There were only five clinical and five educational supervisors that participated in this study which limited the depth of findings.

### Background

Increasing patient demand, workforce shortages and escalating costs are key challenges encountered by healthcare systems worldwide.<sup>1</sup> Both in the United Kingdom (UK) and internationally, there has been a drive to develop a flexible, multidisciplinary healthcare workforce that can competently work in different organisations and sectors to enable effective service provision across integrated care systems.<sup>2-5</sup> The reported benefits of expanding the role of the non-medical workforce (e.g. nurses, pharmacists, optometrists, chiropractors, physiotherapists, psychologists, occupational therapists, dieticians) include: improving patients' access to healthcare, reducing healthcare costs, controlling prescribing expenditure, detecting and resolving drug related problems, and making clinical interventions to patients' medicines.<sup>6-8</sup> In the UK, in part driven by current NHS workforce pressures,<sup>9</sup> 'advanced practice' roles are increasingly being introduced so that new services can be provided by staff who are competent and have clinical capacity.<sup>3</sup> Advanced practitioners include healthcare professionals from a range of professional backgrounds (e.g. nursing, pharmacy, paramedics occupational therapy) widening their scopes of practice, working more autonomously, taking on more patient-facing, clinical work in a range of healthcare settings.<sup>2</sup> Similar policy initiatives on advanced practice and optimising healthcare workforce skill mix exist in other countries.<sup>10</sup>

Of particular importance is preparing the healthcare workforce to work across different settings, and to gain the skills and confidence needed to do so. Effective supervision plays a key part in this preparation, supporting trainees to apply their learning in practice, to facilitate deeper learning.<sup>11</sup> Whilst there are different forms of, and approaches to, supervision (e.g. clinical supervision, educational supervision, managerial supervision, informal supervision, mentoring, coaching), they share a common goal which is to promote trainees' personal and professional development.<sup>12</sup> Hence, supervision often involves one-to-one encounters between trainees and supervisors which promote the development of competence and reflective practice. This includes (but is not limited to) guidance, management, training, assessment, or remediation.

In medical education, the most common form of supervision is clinical supervision which consists of oversight of day-to-day clinical performance with regular feedback.<sup>13</sup> The benefits

1  
2  
3 of effective clinical supervision in facilitating learning and performance have been widely  
4 recognised in both the medical and nursing literature.<sup>14-19</sup> Common features of effective  
5 supervision include: availability of supervisor, informative feedback, effective communication  
6 and a supportive relationship between supervisor and supervisee.<sup>18-21</sup> Of paramount  
7 importance is having clinical supervisors with the experience, skills and knowledge to support  
8 learners in the workplace.<sup>22</sup>  
9  
10

11 Another, more recently established, form of supervision is 'educational supervision'. In the  
12 medical literature, this role involves establishing trainees' learning needs and reviewing  
13 progress to ensure that trainees are making the necessary clinical and educational progress.<sup>11</sup>  
14 The medical literature on educational supervision suggests that educational supervision is  
15 beneficial when supervisors provide learners with adequate support to identify their learning  
16 requirements along with sufficient access to appropriate training opportunities.<sup>23 24</sup> On the  
17 other hand, inadequate time, lack of training and clarity on supervision role detracts from the  
18 benefit of educational supervision.<sup>13 23</sup> Apart from physicians and nurses, research is limited  
19 in relation to different types of supervision models in the training and development of a wider  
20 range of healthcare professionals which will support the expansion of skill-mix within  
21 healthcare teams.  
22  
23  
24  
25

26 Pharmacy professionals' skills have been increasingly recognised in the UK, and they have  
27 been deployed across a range of primary care settings, partially due to funding from the  
28 Pharmacy Integration Fund (PhIF). Therefore, pharmacy offers a good exemplar to explore  
29 the role of supervision to support a move to advanced practice. The PhIF was launched by  
30 NHS England (NHSE) in 2016 to commission and evaluate activities that integrate pharmacy  
31 professionals in community pharmacies and other primary care settings to deliver medicines  
32 optimisation and clinical pharmacy services for patients as part of an integrated system.<sup>25</sup>  
33  
34

35 In UK pharmacy, there is no real culture of, or formal support/ framework for, registered  
36 pharmacy professionals' support or supervision. Some evidence has been emerging on the  
37 process (or lack) of supervision and support for pharmacists and pharmacy technicians in the  
38 workplace, mostly stemming from the period prior to registration.<sup>26-29</sup> Community pharmacists,  
39 for example, commonly work as the sole pharmacist and do not have access to peer support  
40 or supervision in the workplace. Another issue is the lack of consistency in work-based  
41 experiences for pharmacy professionals within and between hospital and community  
42 pharmacy sectors. For instance, hospital pharmacists learn about specialist medicines on  
43 ward rotations whereas in community pharmacy, pharmacists develop knowledge of over-the-  
44 counter medicines.<sup>30</sup> In addition, pharmacy technician education and training lacks the clinical  
45 focus required to take on extended roles, and, in community pharmacy, technicians' roles are  
46 not clearly defined or sufficiently different from other support staff.<sup>29</sup>  
47  
48  
49

50 More recently, pharmacy professionals increasingly work in a range of primary care settings,  
51 which have a limited understanding of their skills or learning needs.<sup>31</sup> To support pharmacy  
52 professionals, and indeed other types of advanced practitioners, to fit into a multidisciplinary  
53 team and be supported to do so for best patient care, it is important to understand what  
54 supervision is required. A better understanding of supervision requirements can help design  
55 a supervision model which supports the learning of pharmacy professionals and other  
56 healthcare professionals in advancing their practice.  
57  
58  
59  
60

1  
2  
3 The aim of this paper is to explore how supervision can contribute to the development of  
4 advanced practitioners using the example of a number of PhIF-funded post-registration  
5 training pathways for pharmacy professionals (pharmacists and pharmacy technicians) in  
6 England.  
7  
8

### 9 Pharmacy Integration Programme in England

11 In the context of pharmacy in England, Health Education England (HEE)<sup>1</sup> commissioned a  
12 range of training and development pathways to support the development of pharmacy  
13 professionals to extend their scope of practice, funded through PhIF.  
14

15 As defined by HEE, “advanced level practice isn’t a specific role, it includes all practitioners  
16 who have progressed to an advanced level through further education and training”.<sup>32</sup> PhIF is  
17 providing support for a number of learning pathways which facilitate advanced practice. The  
18 focus of this paper is on the following pathways: Medicines Optimisation in Care Homes  
19 (MOCH), Integrated Urgent Care (IUC), Accuracy Checking Pharmacy Technician (ACPT),  
20 and post-registration programmes (**Table 1**). These pathways, whilst having some  
21 commonalities, were also quite different, with some (post-registration and ACPT) focusing on  
22 training without pharmacy professionals moving to a new role or setting, whilst others  
23 encompassed employment in a new role (urgent care setting or care home) accompanied by  
24 a programme of learning. Learners on MOCH, IUC, and some post-registration pathways were  
25 provided with educational supervisors. The role of educational supervisors was to guide  
26 learners in an educational capacity on behalf of the training provider. Learners on the MOCH  
27 and IUC pathways were also assigned clinical supervisors to guide them in their clinical  
28 practice at their place of work; and on ACPT, pharmacy technicians had workplace supervisors  
29 which worked alongside learners in the same setting and provided guidance on day-to-day  
30 activities. The following table provides a description of the key elements of the learning  
31 pathways  
32  
33  
34  
35

36 **[Insert Table 1 here]**  
37  
38  
39  
40

### 41 Theory of workplace pedagogy

43 This paper draws on educational theory to shed light on the contribution of supervision in  
44 supporting the development of pharmacy professionals as advanced clinical practitioners.  
45 Billet’s theory of workplace pedagogy<sup>37</sup> focuses on learning opportunities and resources made  
46 available in the workplace and how the trainee engages with opportunities and resources  
47 provided in that workplace (**Table 2**). Billet’s workplace theory is grounded in the idea that  
48 learning solely through participation in everyday work activities may not be sufficient without  
49 guidance of more experienced co-workers. In the context of this study, pharmacy  
50 professionals’ learning and development was reliant upon them obtaining the support,  
51 resources and guidance required to contribute to the workplace. This also depended on what  
52 was offered to pharmacy learners and on their personal characteristics and motives. Hence,  
53 using Billet’s theory of workplace pedagogy as a lens to analyse and interpret findings helps  
54  
55  
56  
57

58  
59 <sup>1</sup> the NHS statutory body responsible for the education and training of the health workforce  
60



1  
2  
3 uncover what contributes to an effective supervision model to support the learning of  
4 healthcare professionals in advanced clinical practice roles.  
5

6  
7 **[Insert Table 2 here]**  
8  
9

## 10 **Design**

11  
12 This study is part of a wider mixed methods evaluation of PhIF Learning Pathways. Data from  
13 semi-structured qualitative interviews with learners and supervisors were analysed to unpack  
14 the role of supervision, and what contributes to, or detracts from, effective workplace learning  
15 in these pathways.  
16

17  
18 Learners from each of the learning pathways in the PhIF evaluation were invited to take part  
19 in these interviews. To recruit education and clinical supervisors on the PhIF pathways,  
20 learning providers distributed email invitations amongst their networks, requesting those  
21 interested to contact the research team. Recruitment adverts were also distributed by the  
22 research team via social media.  
23

24  
25 Telephone interviews were conducted by 3 members of the research team with learners and  
26 supervisors between January and March 2020. Interviews ranged from 25 to 60 minutes. Field  
27 notes were taken during or after the interview. Those conducting interviews had considerable  
28 experience conducting qualitative research from previous research. They were paused for two  
29 months at the start of the COVID-19 pandemic and resumed from June to November 2020.  
30 Interview questions were tailored to understand the views and experiences of learners and  
31 supervisors in relation to the learning pathways and the subsequent application of learning in  
32 the workplace. Topic guides were informed by the Theoretical Domains Framework, a model  
33 of behaviour change used to understand how learning and policy interventions influence  
34 changes in practice. Questions relating specifically to supervision explored the role of  
35 educational and clinical supervision in facilitating learning and application. Data collection  
36 continued until data saturation was reached.  
37  
38

39  
40 All interviews were audio-recorded and transcribed verbatim. Transcriptions were imported  
41 into NVivo11 to manage the data analysis process. Interview transcripts were analysed using  
42 an abductive approach, integrating inductive data-driven coding with deductive theory-driven  
43 interpretation<sup>38</sup> by positioning empirical findings against components of Billet's work-based  
44 theory. Taking a combined iterative and theoretical approach to analysis ensured that Billet's  
45 work-based education theory was used in an exploratory way to make sense of findings.<sup>39</sup>  
46

47  
48 Forty-seven learners and ten supervisors were interviewed. Interviewed learners included 20  
49 post-registration pharmacists, 13 MOCH pharmacists, three MOCH pharmacy technicians,  
50 seven IUC, and four ACPTs. Supervisors included five clinical supervisors (MOCH=4, IUC=1),  
51 and five educational supervisors from the post-registration pathway.  
52

## 53 **Results**

54  
55 Using Billet's theory of workplace pedagogy, findings have been grouped into three themes to  
56 provide insight into supervision models in terms of developing advanced practitioners (**Table**  
57 **3**):  
58

- 59 • Participation in workplace activities and guided learning at work  
60

- Workplace affordances
- Ongoing support to help meet learning needs

An additional theme was identified from inductive data driven coding but did not map on to Billet's theory:

- Support offered for supervisors

**[Insert Table 3 here]**

### Participation in workplace activities and guiding learning at work

Billet highlights the importance of supervisees being provided with opportunities to observe and participate in workplace activities and receive guidance from supervisors as well as experienced co-workers. This was reflected in learners' accounts regarding their experiences of clinical supervision. Those who portrayed supervision as a beneficial source of support typically described clinical supervision as an opportunity to shadow, be observed by, and receive feedback from an experienced clinician. Learners described having protected time to undertake learning within the workplace, often supported or facilitated by colleagues, and undertaken in conjunction with their supervisor.

*"So, what she [supervisor] would do is just take me through, before a case came in, she would take me through her thought process of what she thought and expected. And then you'd see during the consultation how things change and how things develop. And then we'd debrief afterwards...So, it helped that learning experience and then we'd discuss it afterwards and identify anything that I wanted to work on further or anything in my portfolio that I had to get experience, to tick off that competency." (Pharmacist learner; IUC.136)*

Billet refers to guided learning as "a more experienced co-worker (the mentor) using techniques and strategies to guide and monitor the development of the knowledge of those who are less skilful (the mentees)".<sup>40</sup> Guided learning was an essential component of the clinical supervisory role. Clinical supervisors typically conceptualised their role in terms of supporting learners to develop proficiency and confidence with regards to translating and applying the knowledge and skills they were gaining into their clinical practice.

*"So, for me, it's about practical application of what they learn through, you know, reading or on study days or through their discussion groups. So, for me, the course needs to put in a foundation of clinical knowledge that we can then apply, on the one hand almost patient by patient because it's a very patient focused service in real terms, but equally, it's also about the clinical confidence..." (Clinical supervisor; MOCH.502)*

Several clinical supervisors highlighted their role in supporting learners to overcome initial challenges, including a lack of established professional networks and information governance agreements between organisations. This included supporting learners to understand and orientate themselves within their practice environments whilst navigating the relational and structural aspects of their new role and work environments:

1  
2  
3  
4  
5  
6  
7  
8  
9  
10  
11  
12  
13  
14  
15  
16  
17  
18  
19  
20  
21  
22  
23  
24  
25  
26  
27  
28  
29  
30  
31  
32  
33  
34  
35  
36  
37  
38  
39  
40  
41  
42  
43  
44  
45  
46  
47  
48  
49  
50  
51  
52  
53  
54  
55  
56  
57  
58  
59  
60

*"Yes, I think it's an enabling role, I think it's somebody who, I think more of this is about relationships and actually facilitating and navigating these individuals to embed them locally. And when we are talking about primary care and integrated care, actually making that as seamless as possible for them to do that." (Clinical supervisor; MOCH.500)*

Supervisors frequently described facilitating critical reflection as a key element of their role:

*"...it's all about encouraging people isn't it? And making sure that they're aware of their own working practices, making sure that they're aware, what their strengths and their own weaknesses are, so that they can regulate themselves a little bit more." (Work-based supervisor; ACPT.203)*

Signposting learners to other sources of relevant support was additionally referenced as a means of enabling learners to progress their learning and expand their support networks.

*"I've had lots of discussions about trying to enable those individuals to get what they need, and it's not always from me, but actually from a number of different individuals, depending on what the nature of the problem of the challenge is that has presented itself." (Clinical supervisor; MOCH.500)*

Learners on different pathways valued support from the wider team (particularly other pharmacists) to ease their transition into new advanced roles. However, some learners thought that teamwork and collaboration between pharmacy teams and wider healthcare professionals still needed improvement.

*"Because naturally in the team previously I think pharmacists have been the ones doing the medication, main medication review and when it gets, you know, and it's like, oh technicians do that bit whereas now we're becoming more as a team... so sometimes there is a bit of resistance, a bit of natural resistance because people fear the unknown." (Pharmacy technician learner; MOCH.104)*

### Workplace affordances

Billet describes "workplace affordances" as the way the workplace shapes learning by providing learners access to activities and the direct and indirect guidance that individuals are able to access at the workplace.<sup>37</sup> In this study, clinical supervisors who also acted as learners' line managers were a good fit as they were frequently able to offer a combination of regular pre-arranged face-to-face meetings alongside the opportunity for more ad hoc contact as and when learners felt this was needed.

On the other hand, several learners felt their clinical supervisors were mismatched to their needs. Reasons that learners felt this ranged from supervisors lacking relevant experience, to being located geographically far away and lacking understanding of the role or course. These factors / conditions led to a lack of affordances:

*"I think that because the person [supervisor] hadn't done the course themselves and had only had the training that's offered, didn't understand a lot of what had to be done and things and relied very heavily on me explaining to her, so I think that the training was obviously lacking. But she did the best that she could." (Pharmacist learner; MOCH. 109)*

Lack of proximity to the learner also created challenges in respect of observing learners' practice and assessing competencies.

1  
2  
3  
4  
5  
6  
7  
8  
9  
10  
*"I think the idea of the clinical supervisor would be that you are spending time directly with that individual during their clinical practice and some of the physical examination assessments and observing those, you know, the way in which the assessments were structured and the criteria were put in place that I just couldn't fulfil the role that was described, I think that's the way to put it, because of the lack of capacity that I had really." (Clinical supervisor; MOCH.502)*

11  
12  
13  
14  
Workplace affordances were not solely derived from the supervisor. The delegation of observation and assessment responsibilities to others was frequently cited as a means of overcoming challenges regarding capacity and geographical spread.

15  
16  
17  
18  
*"Well we managed to work round it by very kind nurses and doctors working alongside him [clinical supervisor] to get us signed off for all the bits that needed to be signed off and they supervised us." (Pharmacist learner; MOCH.115)*

19  
20  
21  
22  
23  
24  
Utilising the skills and expertise across the workplace was beneficial to learners. Learners who described receiving clinical supervision from other types of health care professionals, particularly those receiving supervision from GPs and nurses, tended to describe the experience positively.

25  
26  
27  
28  
29  
30  
31  
*"The organisation helped me shadow different GPs and different nurse practitioners to get a good flavour of the different kinds of consultation styles and different kinds of cases that you'd be dealing with. Because a nurse practitioner will deal with different things than a GP sometimes and handle them in a different way." (Pharmacist learner; IUC.136)*

32  
33  
34  
35  
Issues with supervisor availability and expertise were less frequently encountered by ACPT learners who were all allocated a supervisor within their workplace which afforded them high accessibility, level of support and feedback.

36  
37  
38  
39  
40  
41  
42  
43  
*"Having the [work based] supervisor was quite handy because I always spoke to them. Whenever I worked there, they're there, so I can speak to them and then they could guide me. They would see the way that I work as well and he will give me the improvements and guidance. They were very supportive." (Pharmacy technician learner; ACPT.151)*

#### 44 45 Ongoing support to help meet learning needs

46  
47  
48  
49  
50  
51  
52  
53  
54  
Educational supervision offered a way to fill some of the gaps where local clinical supervision was not available, and in settings like community pharmacy where learners did not have access to clinical/ work-based supervision at all, yet still needed support. Educational supervisors characterised their role in terms of supporting learners to identify their learning needs and the requirements of the learning pathway, and then as an ongoing available source of support in relation to any personal or academic challenges that learners encountered as they progressed through a pathway. Setting realistic and manageable aims and objectives with learners was described as a key component of the educational supervisor role.

55  
56  
57  
58  
59  
60  
*"I would say it's having that initial meeting over the telephone, or even in person with the student, to really develop a development plan and their learning needs analysis, because we want to find out initially, because we need to plan ahead, what their backgrounds are, what their aims are, what they want to achieve and between us we come with objectives and realistic objectives, because a lot of*

1  
2  
3 *people think coming here expecting one thing, when in reality it's completely*  
4 *different" (Educational supervisor; post registration pathway.200)*  
5

6 For some learners, educational supervision appeared to be structured and readily available.  
7 These learners discussed receiving frequent structured reviews that were planned in advance.  
8 On the contrary, some learners described the educational supervision that was available as  
9 being largely learner-led. These learners felt they would have benefited from more proactive  
10 support from their supervisors.  
11

### 12 Support offered for supervisors

13  
14 When asked about support or training received for supervision, some supervisors described  
15 feeling well supported in their role. This was attributed to having access to other supervisors  
16 with vast experience for support as well as wider networks. Other supervisors often reported  
17 feeling largely unsupported in their supervisory role, particularly those that supported learners  
18 who were not based within a service that they managed. Suggestions for additional support  
19 included face-to-face supervisor training sessions, and additional structure and clarity around  
20 expectations and monitoring associated with the role.  
21  
22

23 *"I mean, I think going forward, we probably want to put in some kind of face-to-*  
24 *face clinical supervisor training session or contact session." (Clinical supervisor;*  
25 *MOCH.500)*  
26  
27  
28  
29

## 30 **Discussion**

31 Drawing on qualitative data from a wider mixed methods evaluation of PhIF learning pathways,  
32 this paper explored pharmacy learners' and their supervisors' views on supervision models  
33 which can contribute to the development of advanced practitioners. Using Billet's theory of  
34 workplace pedagogy as an interpretive framework enabled an understanding of the  
35 mechanisms facilitating effective supervision. Findings from this study should be considered  
36 in future policy interventions relevant for enhancing the education and training of advanced  
37 practitioners.  
38  
39

40 Participants in this study drew out important elements for effective supervision of advanced  
41 practitioners highlighting key workplace pedagogic practices such as: supporting learners to  
42 identify their learning needs (setting realistic and manageable aims and objectives); guided  
43 learning at work (i.e. opportunity to shadow, be observed by, and receive feedback from an  
44 experienced clinician), combination of regular pre-arranged face-to-face meetings and ad hoc  
45 contact when needed; along with ongoing support as learners' progressed through a learning  
46 pathway. These findings are consistent with studies on supervision in medical and nursing  
47 education, where setting clear goals and actions to achieve learning outcomes; facilitating  
48 learners' participation in workplace activities; providing regular ongoing feedback; and  
49 responsive support facilitate personal and professional development for learners.<sup>41-43</sup>  
50  
51  
52

53 The educational and clinical supervisory roles in this study were described as complementary,  
54 offering distinct but connected contributions to learning, with clinical supervisors aiming to  
55 support learners to apply their learning in practice and educational supervisors focusing on  
56 supporting learners to navigate the requirements of a learning pathway. These findings  
57 complement existing research and guidance in medicine and nursing around the roles of  
58 clinical and educational supervision.<sup>11 13</sup> However, our evaluation highlighted that supervision  
59  
60



1  
2  
3 needs to be more consistent in terms of supervisors' availability and accessibility, knowledge  
4 and experience, and level of support.  
5

6 Achieving effective supervision requires a flexible approach to supervision suited to local  
7 circumstances and context of the setting. Important considerations involve having clinical  
8 supervisors in practice settings with good proximity, good understanding and experience of  
9 working in the setting. It is beneficial to have a supervisor from the same profession,  
10 particularly if there are issues around role clarity in newer settings. Equally, or possibly more  
11 beneficial, is for learners to have supervision from different professions to support the breadth  
12 of development necessary across all areas of advanced practice. Advanced practitioners  
13 come from a range of professions and there will be some overlap in roles and responsibilities  
14 across different professions. This was gleaned from learner accounts in this study, where  
15 learners receiving some form of clinical supervision from other types of health care  
16 professionals tended to describe the experience positively as they developed a broader  
17 understanding of how different professions provide patient care. Hence, supervisory tasks do  
18 not necessarily have to be profession specific; what is more important is for supervisors to  
19 have the knowledge, skills and availability to help the learner to develop a specified capability  
20 and assess trainee competence. Such multi-professional approaches are common in training  
21 of medical students<sup>44</sup> and could ensure early career advanced practitioners' broad knowledge  
22 and skills are encompassed.  
23  
24  
25  
26

27 In addition to clinical supervision focusing on specific individual learning needs in the  
28 workplace, more formative educational supervision is needed to identify learning needs,  
29 provide continuous and responsive support with a focus on guiding learners' development  
30 from single sector healthcare professionals to cross-sector healthcare professionals. An  
31 educational supervisor should be responsible for overseeing and coordinating multi-  
32 professional learning with clinical supervisors. Educational supervisors in this study also  
33 offered a way to fill in some of the gaps where there was a lack of local clinical supervision,  
34 and in settings like community pharmacy where pharmacist learners did not have access to  
35 clinical supervision at all – where they are otherwise isolated and relatively unsupported.<sup>45</sup>  
36 There may also be a role for an arms-length clinical mentor, who has the clinical knowledge  
37 but does not work close by – particularly in situations where learners work in isolation (e.g.  
38 community pharmacy). Structured mentoring programmes have been implemented to facilitate  
39 specific career-advancement of healthcare professionals (mainly nurses) where reported  
40 benefits are consolidation of the mentees' professional and social skills, increased self-  
41 confidence, improved communication skills leadership development, and succession  
42 planning.<sup>46 47</sup>  
43  
44  
45  
46

47 Our findings also highlight the need for developing a flexible healthcare workforce with  
48 supervision skills in a variety of settings so they can meet the needs of the learners, where  
49 advanced practice and behaviour and practice change are the goal. Training and support for  
50 supervision should include a range of flexible supervision models/styles which can be adapted  
51 by supervisors to facilitate interaction and ensure continuity regardless of setting. These  
52 models should be underpinned by an integrated approach to supervision which recognises  
53 communication pathways between different type of supervisors and other means of support  
54 (e.g. mentors, line managers etc.) involved within the learner's training and education  
55 pathway. Supervisors also need organisational support to facilitate their professional  
56 development and balance supervision duties with daily practice.<sup>48</sup>  
57  
58  
59  
60

1  
2  
3 In addition to providing supervisors with guidance on best supervisory practices and  
4 organisational support, expectations for advanced practitioners need to be clearly defined  
5 otherwise supervisors and learners may hold conflicting views which will negatively impact  
6 learning and supervision experiences.<sup>49 50</sup> It is also advisable that healthcare professionals  
7 from different disciplines are made aware of the professional role and capabilities of learners  
8 to offset challenges with professional identity formation and adjustment ('identity work') in new  
9 workplace settings.<sup>51</sup> Findings from this study suggest that having a more experienced  
10 healthcare professional in the workplace from the same discipline as the learner could help  
11 facilitate professional identity work. Interprofessional education and training in the workplace  
12 are also other means which can enhance professional identity formation and a collaborative  
13 approach to patient care<sup>52-54</sup>

14  
15  
16  
17 Our study limitations include self-selection, self-reporting, social desirability and recall bias  
18 making findings more positive. Any potential bias that could occur due to two of the authors  
19 being pharmacists was mitigated as those conducting and analysing the interviews were not  
20 pharmacists. Another limitation is that there were only five clinical and five educational  
21 supervisors. In addition, all the educational supervisors which participated in our study were  
22 from the post-registration learning pathway which limited the depth of findings on educational  
23 supervision. Nonetheless, views of learners from other learning pathways (although limited)  
24 helped us gather some insights on the role of clinical and educational supervision across the  
25 board.  
26  
27  
28

## 29 Conclusion

30  
31 Using educational theory, this study highlights important considerations for effective  
32 supervision of pharmacy learners in advanced practitioner roles. Insights from this study can  
33 inform the education and training of advanced practitioners from different professions to  
34 support healthcare workforce development and integrated multi-disciplinary working in  
35 different healthcare settings. Future research should focus on developing models which  
36 encourage interprofessional supervision and mentoring to support development of advanced  
37 practitioners in different settings and to aid with supervisory capacity in the existing workforce.  
38  
39  
40

41  
42 **Funding statement:** This work was funded by NHS England Pharmacy Integration Fund.  
43

44 **Competing interest:** None  
45

46 **Acknowledgements:** We would like to thank NHS England Pharmacy Integration Fund for  
47 funding the evaluation. We would also like to thank all participants who took part in the  
48 interviews.  
49

50 **Contributors:** JA, SS, CF were responsible for data collection. JA, SS and CF coded and  
51 analysed the interview transcripts which was overseen by SJ with input from EIS. AH was  
52 responsible for applying educational theory to interpret the data analysis which was overseen  
53 by SW with input from EIS, SJ, IM, ES and AM. AH drafted the manuscript, which EIS, SW,  
54 SJ, JA, IM, ES, SS, CF and AM commented on and edited. The final manuscript was read and  
55 approved by all authors.  
56

57 **Ethics Approval:** This study received ethics approval by The University of Manchester  
58 Research Ethics Committee (Ref no. 2019-7358-12719). Written or verbal consent to  
59 participate in the study was obtained from each participant prior to starting data collection.  
60

1  
2  
3  
4 **Patient consent form:** N/A  
5

6 **Data sharing statement:** The datasets generated and/or analysed during the current study  
7 are not publicly available due to protection of participant confidentiality.  
8  
9

## 10 11 12 **References**

- 13  
14 1. Buchan J, Campbell J. Challenges posed by the global crisis in the health workforce. *BMJ*  
15 2013;347
- 16  
17 2. NHS. Interim NHS People Plan, 2019. Available: [https://www.longtermplan.nhs.uk/wp-](https://www.longtermplan.nhs.uk/wp-content/uploads/2019/05/Interim-NHS-People-Plan_June2019.pdf)  
18 [content/uploads/2019/05/Interim-NHS-People-Plan\\_June2019.pdf](https://www.longtermplan.nhs.uk/wp-content/uploads/2019/05/Interim-NHS-People-Plan_June2019.pdf) [Accessed 01 Sept  
19 2021].
- 20  
21 3. NHS. The NHS Long Term Plan 2019. Available: [https://www.longtermplan.nhs.uk/wp-](https://www.longtermplan.nhs.uk/wp-content/uploads/2019/01/nhs-long-term-plan-june-2019.pdf)  
22 [content/uploads/2019/01/nhs-long-term-plan-june-2019.pdf](https://www.longtermplan.nhs.uk/wp-content/uploads/2019/01/nhs-long-term-plan-june-2019.pdf) [Accessed 01 Sept  
23 2021]
- 24  
25 4. Nancarrow SA. Six principles to enhance health workforce flexibility. *Hum Resour Health*  
26 2015;13:9.
- 27  
28 5. Fulton BD, Scheffler RM, Sparkes SP, et al. Health workforce skill mix and task shifting in  
29 low income countries: a review of recent evidence. *Hum Resour Health* 2011;9:1.
- 30  
31 6. Dalton K, Byrne S. Role of the pharmacist in reducing healthcare costs: current insights.  
32 *Integr Pharm Res Pract* 2017;6:37-46.
- 33  
34 7. Koehler T, Brown A. Documenting the evolution of the relationship between the pharmacy  
35 support workforce and pharmacists to support patient care. *Res Social Adm Pharm*  
36 2017;13(2):280-85.
- 37  
38 8. Kroezen M, van Dijk L, Groenewegen PP, et al. Nurse prescribing of medicines in Western  
39 European and Anglo-Saxon countries: a systematic review of the literature. *BMC*  
40 *Health Serv Res* 2011;11:127.
- 41  
42 9. Buchan J, Charlesworth A, Gershlick B, et al. A critical moment: NHS staffing trends,  
43 retention and attrition. The Health Foundation 2019.
- 44  
45 10. de Bont A, van Exel J, Coretti S, et al. Reconfiguring health workforce: a case-based  
46 comparative study explaining the increasingly diverse professional roles in Europe.  
47 *BMC Health Serv Res* 2016;16(1):637.
- 48  
49 11. Kilminster S. Understanding the Nature and Purpose of Clinical and Educational  
50 Supervision. *InnovAiT* 2010;3(10):615-18.
- 51  
52 12. Clark P, Jamieson A, Launer J, et al. Intending to be a supervisor, mentor or coach? Which,  
53 what for and why? *Educ Prim Care* 2006;17(2):109-16.
- 54  
55 13. Kilminster S, Cottrell D, Grant J, et al. AMEE Guide No. 27: Effective educational and clinical  
56 supervision. *Med Teach* 2007;29(1):2-19.
- 57  
58 14. Dornan T, Boshuizen H, King N, et al. Experience-based learning: a model linking the  
59 processes and outcomes of medical students' workplace learning. *Med Educ*  
60 2007;41(1):84-91.



15. Teunissen PW, Stapel DA, Scheele F, et al. The influence of context on residents' evaluations: effects of priming on clinical judgment and affect. *Adv Health Sci Educ Theory Pract* 2009;14(1):23-41.
16. Clement T, Brown J, Morrison J, et al. Ad hoc supervision of general practice registrars as a 'community of practice': analysis, interpretation and re-presentation. *Adv Health Sci Educ Theory Pract* 2016;21(2):415-37.
17. Weallans J, Roberts C, Hamilton S, et al. Guidance for providing effective feedback in clinical supervision in postgraduate medical education: a systematic review. *Postgrad Med J* 2021; 2020-139566.
18. Howard V, Eddy-Imishue GK. Factors influencing adequate and effective clinical supervision for inpatient mental health nurses' personal and professional development: An integrative review. *J Psychiatr Ment Health Nurs* 2020;27(5):640-56.
19. Donough G, Van der Heever M. Undergraduate nursing students' experience of clinical supervision. *Curationis* 2018;41(1):e1-e8.
20. Bifarin O, Stonehouse D. Clinical supervision: an important part of every nurse's practice. *Br J Nurs* 2017;26(6):331-35.
21. Milne D, Aylott H, Fitzpatrick H, et al. How Does Clinical Supervision Work? Using a "Best Evidence Synthesis" Approach to Construct a Basic Model of Supervision. *Clin Superv* 2008;27(2):170-90.
22. Sirola-Karvinen P, Hyrkas K. Clinical supervision for nurses in administrative and leadership positions: a systematic literature review of the studies focusing on administrative clinical supervision. *J Nurs Manag* 2006;14(8):601-9.
23. Abdulla A. Educational supervision: a new challenge. *J R Soc Med* 2008;101(1):6.
24. Patel P. An evaluation of the current patterns and practices of educational supervision in postgraduate medical education in the UK. *Perspect Med Educ* 2016;5(4):205-14.
25. NHS England. Pharmacy Integration Fund Briefing 2021. Available: <https://www.england.nhs.uk/wp-content/uploads/2016/11/pharmacy-integration-fund-briefing.pdf> [Accessed 04 Sept 2021].
26. Magola E, Willis SC, Schafheutle EI. The development, feasibility and acceptability of a coach-led intervention to ease novice community pharmacists' transition to practice. *Res Social Adm Pharm* 2021;S1551-7411(21)00119-4.
27. Schafheutle EI, Jee SD, Willis SC. The influence of learning environment on trainee pharmacy technicians' education and training experiences. *Res Social Adm Pharm* 2018;14(11):1020-26.
28. Jee SD, Schafheutle EI, Noyce PR. Using longitudinal mixed methods to study the development of professional behaviours during pharmacy work-based training. *Health Soc Care Community* 2017;25(3):975-86.
29. Schafheutle EI, Jee SD, Willis SC. Fitness for purpose of pharmacy technician education and training: The case of Great Britain. *Res Social Adm Pharm* 2017;13(1):88-97.
30. Jee SD, Schafheutle EI, Noyce PR. Exploring the process of professional socialisation and development during pharmacy pre-registration training in England. *Int J Pharm Pract* 2016;24(4):283-93.

- 1
  - 2
  - 3
  - 4
  - 5
  - 6
  - 7
  - 8
  - 9
  - 10
  - 11
  - 12
  - 13
  - 14
  - 15
  - 16
  - 17
  - 18
  - 19
  - 20
  - 21
  - 22
  - 23
  - 24
  - 25
  - 26
  - 27
  - 28
  - 29
  - 30
  - 31
  - 32
  - 33
  - 34
  - 35
  - 36
  - 37
  - 38
  - 39
  - 40
  - 41
  - 42
  - 43
  - 44
  - 45
  - 46
  - 47
  - 48
  - 49
  - 50
  - 51
  - 52
  - 53
  - 54
  - 55
  - 56
  - 57
  - 58
  - 59
  - 60
31. Nelson PA, Bradley F, Martindale A-M, et al. Skill-mix change in general practice: a qualitative comparison of three 'new' non-medical roles in English primary care. *Br J Gen Pract* 2019;69(684):e489-e98.
32. NHS Health Education England. Health Education England: Advanced Practice 2021. Available from: <https://advanced-practice.hee.nhs.uk/> [Accessed 04 Sept 2021].
33. NHS England. Medicines optimisation in care homes, 2018. Available: <https://www.england.nhs.uk/wp-content/uploads/2018/03/medicines-optimisation-in-care-homes-programme-overview.pdf> [Accessed 04 Sept 2021].
34. NHS England. Integrating pharmacy into urgent care 2021. Available: <https://www.england.nhs.uk/primary-care/pharmacy/urgent-care/> [Accessed 04 Sept 2021]
35. Quaye S. Accuracy checking pharmacy technician (ACPT) handbook. Available: [https://www.cppe.ac.uk/wizard/files/developing\\_career/acpt%20handbook.pdf](https://www.cppe.ac.uk/wizard/files/developing_career/acpt%20handbook.pdf) [Accessed 04 Sept 2021]
36. PSNC. Post-Registration Training for Community Pharmacists 2021. Available: <https://psnc.org.uk/the-healthcare-landscape/the-pharmacy-integration-fund-phif/post-registration-training-for-community-pharmacists/> [Accessed 04 Sept 2021]
37. Billett S. Toward a Workplace Pedagogy: Guidance, Participation, and Engagement. *Adult Educ Q* 2002;53(1):27-43.
38. Fereday J, Muir-Cochrane E. Demonstrating Rigor Using Thematic Analysis: A Hybrid Approach of Inductive and Deductive Coding and Theme Development. *Int J Qual* 2006;5(1):80-92.
39. Gioia DA, Corley KG, Hamilton AL. Seeking Qualitative Rigor in Inductive Research: Notes on the Gioia Methodology. *Organ Res Methods* 2012;16(1):15-31.
40. Billett S. Guided learning at work. *J Workplace Learn* 2000;12(7):272-85.
41. Wong LCJ, Wong PTP, Ishiyama FI. What Helps and What Hinders in Cross-Cultural Clinical Supervision: A Critical Incident Study. *The Counseling Psychologist* 2012;41(1):66-85.
42. Bogo M, Paterson J, Tufford L, et al. Interprofessional Clinical Supervision in Mental Health and Addiction: Toward Identifying Common Elements. *Clin Superv* 2011;30(1):124-40.
43. Jackson D, Davison I, Adams R, et al. A systematic review of supervisory relationships in general practitioner training. *Medical education* 2019;53(9):874-85.
44. General Medical Council. The state of medical education and practice in the UK, 2020. Available: [https://www.gmc-uk.org/-/media/documents/somep-2020\\_pdf-84684244.pdf?la=en&hash=F68243A899E21859AB1D31866CC54A0119E60291](https://www.gmc-uk.org/-/media/documents/somep-2020_pdf-84684244.pdf?la=en&hash=F68243A899E21859AB1D31866CC54A0119E60291) [Accessed: 08 Sept 2021].
45. Magola E, Willis SC, Schafheutle EI. Community pharmacists at transition to independent practice: Isolated, unsupported, and stressed. *Health Soc Care Community* 2018;26(6):849-59.
46. Dopson SA, Griffey S, Ghiya N, et al. Structured Mentoring for Workforce Engagement and Professional Development in Public Health Settings. *Health Promot Pract* 2017;18(3):327-31.
47. Buddeberg-Fischer B, Herta KD. Formal mentoring programmes for medical students and doctors--a review of the Medline literature. *Med Teach* 2006;28(3):248-57.

- 1  
2  
3 48. Snowdon DA, Sargent M, Williams CM, et al. Effective clinical supervision of allied health  
4 professionals: a mixed methods study. *BMC Health Serv Res* 2019;20(1):2.  
5  
6 49. Grant J, Schofield MJ, Crawford S. Managing difficulties in supervision: supervisors'  
7 perspectives. *J Couns Psychol* 2012;59(4):528-41.  
8  
9 50. Rothwell C, Kehoe A, Farook SF, et al. Enablers and barriers to effective clinical supervision  
10 in the workplace: a rapid evidence review. *BMJ Open* 2021;11(9):e052929.  
11  
12 51. Ibarra H, Barbulescu R. Identity as narrative: Prevalence, effectiveness, and consequences  
13 of narrative identity work in macro work role transitions. *Acad Manag Rev*  
14 2010;35(1):135-54.  
15  
16 52. Langendyk V, Hegazi I, Cowin L, et al. Imagining alternative professional identities:  
17 reconfiguring professional boundaries between nursing students and medical  
18 students. *Acad Med* 2015;90(6):732-7.  
19  
20 53. Dickie R, Bartle DE, Jackman K, et al. Clinical supervisors' experiences of using an  
21 interprofessional clinical supervision model in an acute care setting. *J Interprof Care*  
22 2019;33(6):812-15.  
23  
24 54. Chipchase L, Allen S, Eley D, et al. Interprofessional supervision in an intercultural context:  
25 a qualitative study. *J Interprof Care* 2012;26(6):465-71.  
26  
27  
28  
29  
30  
31  
32  
33  
34  
35  
36  
37  
38  
39  
40  
41  
42  
43  
44  
45  
46  
47  
48  
49  
50  
51  
52  
53  
54  
55  
56  
57  
58  
59  
60

## Tables

TABLE 1: Summary of PhIF learning pathways in scope of the evaluation

| Learning pathways                           | Definition                                                                                                                                                                                                                                                                                                                    | Aim                                                                                                                                                                                        | Mode of delivery*                                                            | Supervision                                     |
|---------------------------------------------|-------------------------------------------------------------------------------------------------------------------------------------------------------------------------------------------------------------------------------------------------------------------------------------------------------------------------------|--------------------------------------------------------------------------------------------------------------------------------------------------------------------------------------------|------------------------------------------------------------------------------|-------------------------------------------------|
| <b>Medicines Optimisation in Care Homes</b> | Pharmacist independent prescriber works as a member of the multidisciplinary team to support care home residents achieve medicines optimisation according to need. Pharmacy technician ensures the efficient supply and management of medicines within the care home, supporting care home staff and residents. <sup>33</sup> | To give pharmacists and pharmacy technicians working in care homes the confidence and skills to deliver medicines optimisation for care home residents as part of a multidisciplinary team | One provider; used a blended approach of online and workplace-based learning | Provided by educational and clinical supervisor |
| <b>Integrated Urgent Care</b>               | Pharmacist independent prescriber works in urgent care as part of the multidisciplinary team where they handle medicines-related enquiries and issues, undertake clinical assessment and treatment of minor ailments and where appropriate, prescribe for repeat prescription requests, and                                   | For pharmacists to develop the knowledge, confidence and adaptability to work effectively in NHS 111/Integrated Urgent Care settings as part of an MDT.                                    | One provider; used a blended approach of online and workplace-based learning | Provided by educational and clinical supervisor |

|                                                 |                                                                                                                                                                                                                                                                    |                                                                                                                                         |                                                                                                              |                                    |
|-------------------------------------------------|--------------------------------------------------------------------------------------------------------------------------------------------------------------------------------------------------------------------------------------------------------------------|-----------------------------------------------------------------------------------------------------------------------------------------|--------------------------------------------------------------------------------------------------------------|------------------------------------|
|                                                 | provide self-care advice. <sup>34</sup>                                                                                                                                                                                                                            |                                                                                                                                         |                                                                                                              |                                    |
| <b>Accuracy Checking Pharmacy Technician</b>    | An accuracy checking pharmacy technician provides the final autonomous accuracy check of dispensed medicines, following clinical check by a pharmacist <sup>35</sup>                                                                                               | To ensure pharmacy technicians are able to check dispensed items safely and effectively, taking a greater leadership role in pharmacies | Used a blended approach of online and workplace-based learning                                               | Provided by work-based supervisor  |
| <b>Post registration programmes<sup>a</sup></b> | Provides community and health in justice pharmacists to choose from a range of courses and modules which focus on: service improvement; extended skills; patient activation; delivering medicines optimisation; and NHS England clinical priorities. <sup>36</sup> | To ensure community pharmacists have the skills and confidence to deliver a range of clinical services across a range of care pathways. | Range of HEIs commissioned; varied blended approach and others providing the learning almost entirely online | Provided by educational supervisor |

\* These pathways commenced in 2018/19. Following COVID-19 pandemic, mode of learning became almost entirely online for all pathways

*a* = post-registration learning pathway mainly involved community pharmacists but was also open to prison pharmacists. The evaluation only involved community pharmacists.

**Table 2: Three planes of workplace pedagogic practices taken from Billet<sup>37</sup>**

|                                                                                                                                                                                                                                                                                                    |
|----------------------------------------------------------------------------------------------------------------------------------------------------------------------------------------------------------------------------------------------------------------------------------------------------|
| <b>Participation in work activities:</b> the organizing of access to and the guidance and monitoring of engagement in work activities of increasing accountability, including access to the direct and indirect guidance that workplaces provide freely through everyday work activities           |
| <ul style="list-style-type: none"> <li>• Learning through undertaking everyday work activities</li> </ul>                                                                                                                                                                                          |
| <ul style="list-style-type: none"> <li>• Sequencing of tasks (from low to highly accountability [peripheral to full participation])</li> </ul>                                                                                                                                                     |
| <ul style="list-style-type: none"> <li>• Opportunities to participate, observe and listen</li> </ul>                                                                                                                                                                                               |
| <ul style="list-style-type: none"> <li>• Opportunities to access goals required for performance</li> </ul>                                                                                                                                                                                         |
| <b>Guided learning at work:</b> direct guidance in the form of intentional learning strategies (e.g., modelling, coaching, questioning, analogies, diagrams) directed toward developing the values, procedures, and understandings that would not be learned through experience or discovery alone |
| <ul style="list-style-type: none"> <li>• Close guidance by experienced workers</li> </ul>                                                                                                                                                                                                          |
| <ul style="list-style-type: none"> <li>• Use of modelling, coaching and scaffolding</li> </ul>                                                                                                                                                                                                     |
| <ul style="list-style-type: none"> <li>• Use of techniques to engage workers in learning for themselves</li> </ul>                                                                                                                                                                                 |
| <ul style="list-style-type: none"> <li>• Use of techniques to develop understanding</li> </ul>                                                                                                                                                                                                     |
| <b>Guided learning for transfer<sup>a</sup> :</b> extending the adaptability of individuals' knowledge to other situations and circumstances                                                                                                                                                       |
| <ul style="list-style-type: none"> <li>• Use of questioning, problem-solving and scenario-building to extend learners' knowledge to novel situations</li> </ul>                                                                                                                                    |

a. *Transferable outcomes will also be developed on the other planes.*

**Table 3: Mapping of themes against components of Billet's theory**

| Components of Billet's theory of workplace pedagogy                                                                                                     | Theme(s)                                                                                                                                                                                                      |
|---------------------------------------------------------------------------------------------------------------------------------------------------------|---------------------------------------------------------------------------------------------------------------------------------------------------------------------------------------------------------------|
| Learning through undertaking everyday work activities<br>Opportunities to participate, observe and listen<br>Use of modelling, coaching and scaffolding | <ul style="list-style-type: none"> <li>• Participation in workplace activities and guided learning at work</li> </ul>                                                                                         |
| Use of techniques to develop understanding                                                                                                              | <ul style="list-style-type: none"> <li>• Participation in workplace activities and guided learning at work</li> <li>• Ongoing support to help meet learning needs</li> </ul>                                  |
| Opportunities to access goals required for performance                                                                                                  | <ul style="list-style-type: none"> <li>• Workplace affordances</li> <li>• Ongoing support to help meet learning needs</li> </ul>                                                                              |
| Close guidance by experienced workers                                                                                                                   | <ul style="list-style-type: none"> <li>• Participation in workplace activities and guided learning at work</li> <li>• Workplace affordances</li> <li>• Ongoing support to help meet learning needs</li> </ul> |
|                                                                                                                                                         | <ul style="list-style-type: none"> <li>• Support offered for supervisors*</li> </ul>                                                                                                                          |

\*Additional theme identified from inductive data driven coding but did not map on to Billet's theory.



## Consolidated criteria for reporting qualitative studies (COREQ): 32-item checklist

Developed from:

Tong A, Sainsbury P, Craig J. Consolidated criteria for reporting qualitative research (COREQ): a 32-item checklist for interviews and focus groups. *International Journal for Quality in Health Care*. 2007. Volume 19, Number 6: pp. 349 – 357

**YOU MUST PROVIDE A RESPONSE FOR ALL ITEMS. ENTER N/A IF NOT APPLICABLE**

| No. Item                                       | Guide questions/description                                                                                                                              | Reported on Page #   |
|------------------------------------------------|----------------------------------------------------------------------------------------------------------------------------------------------------------|----------------------|
| <b>Domain 1: Research team and reflexivity</b> |                                                                                                                                                          |                      |
| <i>Personal Characteristics</i>                |                                                                                                                                                          |                      |
| 1. Interviewer/facilitator                     | Which author/s conducted the interview or focus group?                                                                                                   | Design (page 6)      |
| 2. Credentials                                 | What were the researcher's credentials?<br>E.g. PhD, MD                                                                                                  | Cover page (page 1)  |
| 3. Occupation                                  | What was their occupation at the time of the study?                                                                                                      | Cover page (page 1)  |
| 4. Gender                                      | Was the researcher male or female?                                                                                                                       | N/A                  |
| 5. Experience and training                     | What experience or training did the researcher have?                                                                                                     | Design (page 6)      |
| <i>Relationship with participants</i>          |                                                                                                                                                          |                      |
| 6. Relationship established                    | Was a relationship established prior to study commencement?                                                                                              | No                   |
| 7. Participant knowledge of the interviewer    | What did the participants know about the researcher? e.g. personal goals, reasons for doing the research                                                 | Design (page 6)      |
| 8. Interviewer characteristics                 | What characteristics were reported about the interviewer/facilitator? e.g. Bias, assumptions, reasons and interests in the research topic                | Discussion (page 12) |
| <b>Domain 2: study design</b>                  |                                                                                                                                                          |                      |
| <i>Theoretical framework</i>                   |                                                                                                                                                          |                      |
| 9. Methodological orientation and Theory       | What methodological orientation was stated to underpin the study? e.g. grounded theory, discourse analysis, ethnography, phenomenology, content analysis | Design (page 6)      |
| <i>Participant selection</i>                   |                                                                                                                                                          |                      |
| 10. Sampling                                   | How were participants selected? e.g. purposive, convenience, consecutive, snowball                                                                       | Design (page 6)      |
| 11. Method of approach                         | How were participants approached? e.g. face-to-face, telephone, mail, email                                                                              | Design (page 6)      |
| 12. Sample size                                | How many participants were in the study?                                                                                                                 | Design (page 6)      |



|                                        |                                                                                                                                 |                                                                                                                                              |
|----------------------------------------|---------------------------------------------------------------------------------------------------------------------------------|----------------------------------------------------------------------------------------------------------------------------------------------|
| 13. Non-participation                  | How many people refused to participate or dropped out? Reasons?                                                                 | N/A                                                                                                                                          |
| <i>Setting</i>                         |                                                                                                                                 |                                                                                                                                              |
| 14. Setting of data collection         | Where was the data collected? e.g. home, clinic, workplace                                                                      | N/A (Telephone interviews)                                                                                                                   |
| 15. Presence of non-participants       | Was anyone else present besides the participants and researchers?                                                               | N/A                                                                                                                                          |
| 16. Description of sample              | What are the important characteristics of the sample? e.g. demographic data, date                                               | Design (page 6)                                                                                                                              |
| <i>Data collection</i>                 |                                                                                                                                 |                                                                                                                                              |
| 17. Interview guide                    | Were questions, prompts, guides provided by the authors? Was it pilot tested?                                                   | Design (page 6)                                                                                                                              |
| 18. Repeat interviews                  | Were repeat interviews carried out? If yes, how many?                                                                           | N/A                                                                                                                                          |
| 19. Audio/visual recording             | Did the research use audio or visual recording to collect the data?                                                             | Design (page 6)                                                                                                                              |
| 20. Field notes                        | Were field notes made during and/or after the interview or focus group?                                                         | Design (page 6)                                                                                                                              |
| 21. Duration                           | What was the duration of the interviews or focus group?                                                                         | Design (page 6)                                                                                                                              |
| 22. Data saturation                    | Was data saturation discussed?                                                                                                  | Design (page 6)                                                                                                                              |
| 23. Transcripts returned               | Were transcripts returned to participants for comment and/or correction?                                                        | N/A                                                                                                                                          |
| <b>Domain 3: analysis and findings</b> |                                                                                                                                 |                                                                                                                                              |
| <i>Data analysis</i>                   |                                                                                                                                 |                                                                                                                                              |
| 24. Number of data coders              | How many data coders coded the data?                                                                                            | Contributors (page 12)                                                                                                                       |
| 25. Description of the coding tree     | Did authors provide a description of the coding tree?                                                                           | N/A                                                                                                                                          |
| 26. Derivation of themes               | Were themes identified in advance or derived from the data?                                                                     | Design (page 6-7)                                                                                                                            |
| 27. Software                           | What software, if applicable, was used to manage the data?                                                                      | NVivo mentioned in page 6                                                                                                                    |
| 28. Participant checking               | Did participants provide feedback on the findings?                                                                              | N/A (contact details for participants had to be removed after completion of interviews to comply with university research ethics regulation) |
| <i>Reporting</i>                       |                                                                                                                                 |                                                                                                                                              |
| 29. Quotations presented               | Were participant quotations presented to illustrate the themes/findings? Was each quotation identified? e.g. participant number | Results (pages 7-10)                                                                                                                         |
| 30. Data and findings consistent       | Was there consistency between the data presented and the findings?                                                              | Discussion (pages 14-16)                                                                                                                     |

|                             |                                                                        |                                                                            |
|-----------------------------|------------------------------------------------------------------------|----------------------------------------------------------------------------|
| 31. Clarity of major themes | Were major themes clearly presented in the findings?                   | Results (pages 6-10)                                                       |
| 32. Clarity of minor themes | Is there a description of diverse cases or discussion of minor themes? | Results: Additional theme which did not map on to theory (page 7/ Table 3) |

Once you have completed this checklist, please save a copy and upload it as part of your submission. When requested to do so as part of the upload process, please select the file type: *Checklist*. You will NOT be able to proceed with submission unless the checklist has been uploaded. Please DO NOT include this checklist as part of the main manuscript document. It must be uploaded as a separate file.

# BMJ Open

## Contribution of supervision to the development of advanced practitioners: a qualitative study of pharmacy learners' and supervisors' views

|                                 |                                                                                                                                                                                                                                                                                                                                                                                                                                                                                                                                                                                                                                                                                                                   |
|---------------------------------|-------------------------------------------------------------------------------------------------------------------------------------------------------------------------------------------------------------------------------------------------------------------------------------------------------------------------------------------------------------------------------------------------------------------------------------------------------------------------------------------------------------------------------------------------------------------------------------------------------------------------------------------------------------------------------------------------------------------|
| Journal:                        | <i>BMJ Open</i>                                                                                                                                                                                                                                                                                                                                                                                                                                                                                                                                                                                                                                                                                                   |
| Manuscript ID                   | bmjopen-2021-059026.R1                                                                                                                                                                                                                                                                                                                                                                                                                                                                                                                                                                                                                                                                                            |
| Article Type:                   | Original research                                                                                                                                                                                                                                                                                                                                                                                                                                                                                                                                                                                                                                                                                                 |
| Date Submitted by the Author:   | 07-Feb-2022                                                                                                                                                                                                                                                                                                                                                                                                                                                                                                                                                                                                                                                                                                       |
| Complete List of Authors:       | Hindi, Ali; The University of Manchester, Centre for Pharmacy Workforce Studies, Division of Pharmacy and Optometry<br>Willis, Sarah; The University of Manchester<br>Astbury, Jayne; The University of Manchester<br>Fenton, Catherine; ICF Consulting Services<br>Stearns, Selma; ICF Consulting Services<br>Jacobs, Sally; The University of Manchester Faculty of Biology Medicine and Health<br>McDermott, Imelda; University of Manchester, Centre for Primary Care<br>Moss, Aidan; ICF Consulting Services<br>Seston, Elizabeth; The University of Manchester<br>Schafheutle, Ellen; The University of Manchester, Division of Pharmacy, School of Health Sciences, Faculty of Biology Medicine and Health |
| <b>Primary Subject Heading</b>: | Medical education and training                                                                                                                                                                                                                                                                                                                                                                                                                                                                                                                                                                                                                                                                                    |
| Secondary Subject Heading:      | Qualitative research, Pharmacology and therapeutics, Health services research, Health policy                                                                                                                                                                                                                                                                                                                                                                                                                                                                                                                                                                                                                      |
| Keywords:                       | EDUCATION & TRAINING (see Medical Education & Training), Health policy < HEALTH SERVICES ADMINISTRATION & MANAGEMENT, PRIMARY CARE, CLINICAL PHARMACOLOGY                                                                                                                                                                                                                                                                                                                                                                                                                                                                                                                                                         |
|                                 |                                                                                                                                                                                                                                                                                                                                                                                                                                                                                                                                                                                                                                                                                                                   |

SCHOLARONE™  
Manuscripts



I, the Submitting Author has the right to grant and does grant on behalf of all authors of the Work (as defined in the below author licence), an exclusive licence and/or a non-exclusive licence for contributions from authors who are: i) UK Crown employees; ii) where BMJ has agreed a CC-BY licence shall apply, and/or iii) in accordance with the terms applicable for US Federal Government officers or employees acting as part of their official duties; on a worldwide, perpetual, irrevocable, royalty-free basis to BMJ Publishing Group Ltd ("BMJ") its licensees and where the relevant Journal is co-owned by BMJ to the co-owners of the Journal, to publish the Work in this journal and any other BMJ products and to exploit all rights, as set out in our [licence](#).

The Submitting Author accepts and understands that any supply made under these terms is made by BMJ to the Submitting Author unless you are acting as an employee on behalf of your employer or a postgraduate student of an affiliated institution which is paying any applicable article publishing charge ("APC") for Open Access articles. Where the Submitting Author wishes to make the Work available on an Open Access basis (and intends to pay the relevant APC), the terms of reuse of such Open Access shall be governed by a Creative Commons licence – details of these licences and which [Creative Commons](#) licence will apply to this Work are set out in our licence referred to above.

Other than as permitted in any relevant BMJ Author's Self Archiving Policies, I confirm this Work has not been accepted for publication elsewhere, is not being considered for publication elsewhere and does not duplicate material already published. I confirm all authors consent to publication of this Work and authorise the granting of this licence.

1  
2  
3  
4  
5 **Contribution of supervision to the development of advanced practitioners: a**  
6 **qualitative study of pharmacy learners' and supervisors' views**  
7

8  
9 **Authors:**

10 Ali M.K. Hindi\* (PhD), Sarah Willis (PhD), Jayne Astbury (PhD), Catherine Fenton  
11 (MSc), Selma Stearns (MSc), Sally Jacobs (PhD), Imelda Mcdermott (PhD), Aidan  
12 Moss (MSc), Elizabeth Seston (PhD), Ellen I. Schafheutle (PhD)  
13  
14  
15

16 **\*Author for correspondence**

17 **Full postal address for corresponding author:**

18 Centre for Pharmacy Workforce Studies, Division of Pharmacy and Optometry; School  
19 of Health Sciences; Faculty of Biology, Medicine and Health, The University of  
20 Manchester, Oxford Road, Manchester M13 9PT, United Kingdom  
21  
22

23 Email: [ali.hindi@manchester.ac.uk](mailto:ali.hindi@manchester.ac.uk)  
24  
25  
26  
27  
28  
29  
30  
31  
32  
33  
34  
35  
36  
37  
38  
39  
40  
41  
42  
43  
44  
45  
46  
47  
48  
49  
50  
51  
52  
53  
54  
55  
56  
57  
58  
59  
60

## Abstract

**Objective:** To apply educational theory to explore how supervision can contribute to the development of advanced practitioners using the example of several post-registration primary care training pathways for pharmacy professionals (pharmacists and pharmacy technicians)

**Design:** Qualitative semi-structured telephone interviews applying Billet's theory of workplace pedagogy for interpretation.

**Setting:** England

**Participants:** Fifty one learners and ten supervisors

**Primary outcome:** The contribution of clinical (CS) and educational supervision (ES) to the development of advanced practitioners in primary care.

### Results:

Findings were mapped against components of Billet's theory to provide insights into the role of supervision in developing advanced practitioners. Key elements for effective supervision included: supporting learners to identify their learning needs (ES), guiding learners in everyday work activities (CS), combination of regular pre-arranged face-to-face meetings and ad hoc contact when needed (CS), along with ongoing support as learners progressed through a learning pathway (ES).

Clinical supervisors supported learners to develop proficiency and confidence in translating and applying the knowledge and skills they were gaining into practice. Learners benefitted from having clinical supervisors in the workplace with good understanding and experience of working in the setting, as well as receiving clinical supervision from different types of health care professionals. Educational supervisors supported learners to identify their learning needs and the requirements of the learning pathway, and then as an ongoing available source of support as they progressed through a pathway. Educational supervisors also filled in some of the gaps where there was a lack of local clinical supervision, and in settings like community pharmacy where pharmacist learners did not have access to any clinical supervision.

**Conclusions:** This study drew out important elements which contributed to effective supervision of pharmacy advanced practitioners. Findings can inform the education and training of advanced practitioners from different professions to support healthcare workforce development in different healthcare settings.

### Strengths and limitations of this study

- This study applied Billet's theory of workplace pedagogy as an interpretive framework to better understand the mechanisms facilitating effective supervision of advanced practitioners in primary care settings.
- This study triangulated views of learners and supervisors from different primary care learning pathways to explore the role of clinical and educational supervision across the board.
- Participants volunteered to take part in this study which increased the potential of self-selection, self-reporting, social desirability and recall bias.
- There were only five clinical and five educational supervisors that participated in this study which limited the depth of findings.

### Background

Increasing patient demand, workforce shortages and escalating costs are key challenges encountered by healthcare systems worldwide.<sup>1</sup> Both in the United Kingdom (UK) and internationally, there has been a drive to develop a flexible, multidisciplinary healthcare workforce that can competently work in different organisations and sectors to enable effective service provision across integrated care systems.<sup>2-5</sup> The reported benefits of expanding the role of the non-medical workforce (e.g. nurses, pharmacists, optometrists, chiropractors, physiotherapists, psychologists, occupational therapists, dieticians) include: improving patients' access to healthcare, reducing healthcare costs, controlling prescribing expenditure, detecting and resolving drug related problems, and making clinical interventions to patients' medicines.<sup>6-8</sup> In the UK, in part driven by current NHS workforce pressures,<sup>9</sup> 'advanced practice' roles are increasingly being introduced so that new services can be provided by staff who are competent and have clinical capacity.<sup>3</sup> Advanced practitioners include healthcare professionals from a range of professional backgrounds (e.g. nursing, pharmacy, paramedics occupational therapy) widening their scopes of practice, working more autonomously, taking on more patient-facing roles, clinical work in a range of healthcare settings.<sup>2</sup> Similar policy initiatives on advanced practice and optimising healthcare workforce skill mix exist in other countries.<sup>10</sup>

Of particular importance is preparing advanced practitioners to move between different primary and secondary care settings working as part of a multi-disciplinary team, and to gain the skills and confidence needed to do so. Effective supervision plays a key part in this preparation, supporting trainees to apply their learning in practice, to facilitate deeper learning.<sup>11</sup> Whilst there are different forms of, and approaches to, supervision (e.g. clinical supervision, educational supervision, managerial supervision, informal supervision, mentoring, coaching), they share a common goal which is to promote trainees' personal and professional development.<sup>12</sup> Hence, supervision often involves one-to-one encounters between trainees and supervisors which promote the development of competence and reflective practice. This includes (but is not limited to) guidance, management, training, assessment, or remediation.

1  
2  
3 In medical education, the most common form of supervision is clinical supervision which  
4 consists of oversight of day-to-day clinical performance with regular feedback.<sup>13</sup> The benefits  
5 of effective clinical supervision in facilitating learning and performance have been widely  
6 recognised in both the medical and nursing literature.<sup>14-19</sup> Common features of effective  
7 supervision in medicine, pharmacy, and nursing literature include: availability of supervisor,  
8 informative feedback, effective communication and a supportive relationship between  
9 supervisor and supervisee.<sup>18-22</sup> These features have also been found to facilitate effective  
10 clinical supervision of physiotherapists, occupational therapists, social workers, dietitians,  
11 psychologists, podiatrists and speech pathologists.<sup>23</sup> Of paramount importance is having  
12 clinical supervisors with the experience, skills and knowledge to support learners in the  
13 workplace.<sup>22-24</sup>  
14  
15  
16  
17

18 Another, more recently established, form of supervision is 'educational supervision'. In the  
19 medical literature, this role involves establishing trainees' learning needs and reviewing  
20 progress to ensure that trainees are making the necessary clinical and educational progress.<sup>11</sup>  
21 The medical literature on educational supervision suggests that educational supervision is  
22 beneficial when supervisors provide learners with adequate support to identify their learning  
23 requirements along with sufficient access to appropriate training opportunities.<sup>25 26</sup> On the  
24 other hand, inadequate time, lack of training and clarity on supervision role detracts from the  
25 benefit of educational supervision.<sup>13 25</sup> Apart from physicians and nurses, research is limited  
26 in relation to different types of supervision models in the training and development of a wider  
27 range of healthcare professionals which will support the expansion of skill-mix within  
28 healthcare teams.  
29  
30  
31

32 Pharmacy professionals' skills have been increasingly recognised in the UK, and they have  
33 been deployed across a range of primary care settings, partially due to funding from the  
34 Pharmacy Integration Fund (PhIF). Therefore, pharmacy offers a good exemplar to explore  
35 the role of supervision to support a move to advanced practice. The PhIF was launched by  
36 NHS England (NHSE) in 2016 to commission and evaluate activities that integrate pharmacy  
37 professionals in community pharmacies and other primary care settings to deliver medicines  
38 optimisation and clinical pharmacy services for patients as part of an integrated system.<sup>27</sup>  
39  
40

41 In UK pharmacy, there is no formal support/ framework for registered pharmacy professionals'  
42 support or supervision. There is emerging research that considers the process (or lack) of  
43 supervision and support for pharmacists and pharmacy technicians in the workplace, mostly  
44 stemming from the period prior to registration.<sup>28-31</sup> Community pharmacists, for example,  
45 commonly work as the sole pharmacist and do not have access to peer support or supervision  
46 in the workplace. Another issue is the lack of consistency in work-based experiences for  
47 pharmacy professionals within and between hospital and community pharmacy sectors. For  
48 instance, hospital pharmacists learn about specialist medicines on ward rotations whereas in  
49 community pharmacy, pharmacists develop knowledge of over-the-counter medicines.<sup>32</sup> In  
50 addition, pharmacy technician education and training lacks the clinical focus required to take  
51 on extended roles, and, in community pharmacy, technicians' roles are not clearly defined or  
52 sufficiently different from other support staff.<sup>31</sup>  
53  
54  
55  
56

57 More recently, pharmacy professionals increasingly work in a range of primary care settings,  
58 where other professionals and support staff in the different settings have a limited  
59 understanding of the role and potential learning needs of pharmacy professionals.<sup>33</sup> To  
60 support pharmacy professionals, and indeed other types of advanced practitioners, to fit into



a multidisciplinary team and be supported to do so for best patient care, it is important to understand what supervision is required. A better understanding of supervision requirements can help design a supervision model which supports the learning of pharmacy professionals and other healthcare professionals in advancing their practice.

The aim of this paper is to explore how supervision can contribute to the development of advanced practitioners using the example of a number of PhIF-funded post-registration training pathways for pharmacy professionals (pharmacists and pharmacy technicians) in England.

### Pharmacy Integration Programme in England

In the context of pharmacy in England, Health Education England (HEE)<sup>1</sup> commissioned a range of training and development pathways to support the development of pharmacy professionals to extend their scope of practice, funded through PhIF.

As defined by HEE, “advanced level practice isn’t a specific role, it includes all practitioners who have progressed to an advanced level through further education and training”.<sup>34</sup> PhIF is providing support for a number of learning pathways which facilitate advanced practice. The focus of this paper is on the following pathways: Medicines Optimisation in Care Homes (MOCH), Integrated Urgent Care (IUC), Accuracy Checking Pharmacy Technician (ACPT), and post-registration programmes (**Table 1**). These pathways, whilst having some commonalities, were also quite different, with some (post-registration and ACPT) focusing on training without pharmacy professionals moving to a new role or setting, whilst others encompassed employment in a new role (urgent care setting or care home) accompanied by a programme of learning. Learners on MOCH, IUC, and some post-registration pathways were provided with educational supervisors. The role of educational supervisors was to guide learners in an educational capacity on behalf of the training provider. Learners on the MOCH and IUC pathways were also assigned clinical supervisors to guide them in their clinical practice at their place of work; and on ACPT, pharmacy technicians had workplace supervisors which worked alongside learners in the same setting and provided guidance on day-to-day activities. The following table provides a description of the key elements of the learning pathways.

TABLE 1: Summary of PhIF learning pathways in scope of the evaluation

| Learning pathways                           | Definition                                                                                                                         | Aim                                                                                                                                | Mode of delivery*                                                            | Supervision                                     |
|---------------------------------------------|------------------------------------------------------------------------------------------------------------------------------------|------------------------------------------------------------------------------------------------------------------------------------|------------------------------------------------------------------------------|-------------------------------------------------|
| <b>Medicines Optimisation in Care Homes</b> | Pharmacist independent prescriber works as a member of the multidisciplinary team to support care home residents achieve medicines | To give pharmacists and pharmacy technicians working in care homes the confidence and skills to deliver medicines optimisation for | One provider; used a blended approach of online and workplace-based learning | Provided by educational and clinical supervisor |

<sup>1</sup> the NHS statutory body responsible for the education and training of the health workforce

|                                              |                                                                                                                                                                                                                                                                                                                                     |                                                                                                                                                         |                                                                              |                                                 |
|----------------------------------------------|-------------------------------------------------------------------------------------------------------------------------------------------------------------------------------------------------------------------------------------------------------------------------------------------------------------------------------------|---------------------------------------------------------------------------------------------------------------------------------------------------------|------------------------------------------------------------------------------|-------------------------------------------------|
|                                              | optimisation according to need. Pharmacy technician ensures the efficient supply and management of medicines within the care home, supporting care home staff and residents. <sup>35</sup>                                                                                                                                          | care home residents as part of a multidisciplinary team                                                                                                 |                                                                              |                                                 |
| <b>Integrated Urgent Care</b>                | Pharmacist independent prescriber works in urgent care as part of the multidisciplinary team where they handle medicines-related enquiries and issues, undertake clinical assessment and treatment of minor ailments and where appropriate, prescribe for repeat prescription requests, and provide self-care advice. <sup>36</sup> | For pharmacists to develop the knowledge, confidence and adaptability to work effectively in NHS 111/Integrated Urgent Care settings as part of an MDT. | One provider; used a blended approach of online and workplace-based learning | Provided by educational and clinical supervisor |
| <b>Accuracy Checking Pharmacy Technician</b> | An accuracy checking pharmacy technician provides the final autonomous accuracy check of dispensed medicines, following clinical check by a pharmacist <sup>37</sup>                                                                                                                                                                | To ensure pharmacy technicians are able to check dispensed items safely and effectively, taking a greater leadership role in pharmacies                 | Used a blended approach of online and workplace-based learning               | Provided by work-based supervisor               |

|                                                 |                                                                                                                                                                                                                                                                    |                                                                                                                                         |                                                                                                              |                                    |
|-------------------------------------------------|--------------------------------------------------------------------------------------------------------------------------------------------------------------------------------------------------------------------------------------------------------------------|-----------------------------------------------------------------------------------------------------------------------------------------|--------------------------------------------------------------------------------------------------------------|------------------------------------|
| <b>Post registration programmes<sup>a</sup></b> | Provides community and health in justice pharmacists to choose from a range of courses and modules which focus on: service improvement; extended skills; patient activation; delivering medicines optimisation; and NHS England clinical priorities. <sup>38</sup> | To ensure community pharmacists have the skills and confidence to deliver a range of clinical services across a range of care pathways. | Range of HEIs commissioned; varied blended approach and others providing the learning almost entirely online | Provided by educational supervisor |
|-------------------------------------------------|--------------------------------------------------------------------------------------------------------------------------------------------------------------------------------------------------------------------------------------------------------------------|-----------------------------------------------------------------------------------------------------------------------------------------|--------------------------------------------------------------------------------------------------------------|------------------------------------|

\* These pathways commenced in 2018/19. Following COVID-19 pandemic, mode of learning became almost entirely online for all pathways

a = post-registration learning pathway mainly involved community pharmacists but was also open to prison pharmacists. The evaluation only involved community pharmacists.

### Theory of workplace pedagogy

This paper draws on educational theory to shed light on the contribution of supervision in supporting the development of pharmacy professionals as advanced clinical practitioners. Billet's theory of workplace pedagogy<sup>39</sup> focuses on learning opportunities and resources made available in the workplace and how the trainee engages with opportunities and resources provided in that workplace (**Table 2**). Billet's workplace theory is grounded in the idea that learning solely through participation in everyday work activities may not be sufficient without guidance of more experienced co-workers. In the context of this study, pharmacy professionals' learning and development was reliant upon them obtaining the support, resources and guidance required to contribute to the workplace. This also depended on what was offered to pharmacy learners and on their personal characteristics and motives. Hence, using Billet's theory of workplace pedagogy as a lens to analyse and interpret findings helps uncover what contributes to an effective supervision model to support the learning of healthcare professionals in advanced clinical practice roles.

**Table 2: Three planes of workplace pedagogic practices taken from Billet<sup>39</sup>**

|                                                                                                                                                                                                                                                                                                                                                                                                                                                                                                                                                                                                                                               |
|-----------------------------------------------------------------------------------------------------------------------------------------------------------------------------------------------------------------------------------------------------------------------------------------------------------------------------------------------------------------------------------------------------------------------------------------------------------------------------------------------------------------------------------------------------------------------------------------------------------------------------------------------|
| <p><b>Participation in work activities:</b> the organizing of access to and the guidance and monitoring of engagement in work activities of increasing accountability, including access to the direct and indirect guidance that workplaces provide freely through everyday work activities</p> <ul style="list-style-type: none"> <li>• Learning through undertaking everyday work activities</li> <li>• Sequencing of tasks (from low to highly accountability [peripheral to full participation])</li> <li>• Opportunities to participate, observe and listen</li> <li>• Opportunities to access goals required for performance</li> </ul> |
| <p><b>Guided learning at work:</b> direct guidance in the form of intentional learning strategies (e.g., modelling, coaching, questioning, analogies, diagrams) directed toward developing the values, procedures, and understandings that would not be learned through experience or discovery alone</p> <ul style="list-style-type: none"> <li>• Close guidance by experienced workers</li> <li>• Use of modelling, coaching and scaffolding</li> <li>• Use of techniques to engage workers in learning for themselves</li> <li>• Use of techniques to develop understanding</li> </ul>                                                     |
| <p><b>Guided learning for transfer<sup>a</sup> :</b> extending the adaptability of individuals' knowledge to other situations and circumstances</p> <ul style="list-style-type: none"> <li>• Use of questioning, problem-solving and scenario-building to extend learners' knowledge to novel situations</li> </ul>                                                                                                                                                                                                                                                                                                                           |

a. *Transferable outcomes will also be developed on the other planes.*

## Design

This study is part of a wider mixed methods evaluation of PhIF Learning Pathways. Data from semi-structured qualitative interviews with learners and supervisors were analysed to unpack the role of supervision, and what contributes to, or detracts from, effective workplace learning in these pathways.

Learners from each of the learning pathways in the PhIF evaluation were invited to take part in these interviews. To recruit education and clinical supervisors on the PhIF pathways, learning providers distributed email invitations amongst their networks, requesting those interested to contact the research team. Recruitment adverts were also distributed by the research team via social media.

Telephone interviews were conducted by 3 members of the research team with learners and supervisors between January and March 2020. Interviews ranged from 25 to 60 minutes. Field notes were taken during or after the interview. Those conducting interviews had considerable experience conducting qualitative research from previous research. They were paused for two months at the start of the COVID-19 pandemic and resumed from June to November 2020. Interview questions were tailored to understand the views and experiences of learners and

1  
2  
3 supervisors in relation to the learning pathways and the subsequent application of learning in  
4 the workplace. Topic guides were informed by relevant literature and the Theoretical Domains  
5 Framework, a model of behaviour change used to understand how learning and policy  
6 interventions influence changes in practice. Questions relating specifically to supervision  
7 explored the role of educational and clinical supervision in facilitating learning and application.  
8 Although not pilot tested, topic guides were refined following discussions between the  
9 research team and relevant PhIF stakeholders. Data collection continued until data saturation  
10 was reached.  
11  
12

13 All interviews were audio-recorded and transcribed verbatim. Transcriptions were imported  
14 into NVivo11 to manage the data analysis process. Interview transcripts were analysed using  
15 an abductive approach, integrating inductive data-driven coding with deductive theory-driven  
16 interpretation<sup>40</sup> by positioning empirical findings against components of Billet's work-based  
17 theory. Taking a combined iterative and theoretical approach to analysis ensured that Billet's  
18 work-based education theory was used in an exploratory way to make sense of findings.<sup>41</sup>  
19

20 Fifty one learners and ten supervisors were interviewed. Interviewed learners included 20  
21 post-registration pharmacists, 13 MOCH pharmacists, seven MOCH pharmacy technicians,  
22 seven IUC, and four ACPTs. Supervisors included five clinical supervisors (MOCH=4, IUC=1),  
23 and five educational supervisors from the post-registration pathway.  
24  
25  
26  
27

## 28 Patient and Public Involvement

29 Patients were not involved in design or conduct of this study as the evaluation looked at  
30 learning pathways for pharmacy professionals.  
31  
32  
33

## 34 Results

35 Using Billet's theory of workplace pedagogy, findings have been grouped into three themes  
36 under clinical supervision and educational supervision, to provide insight into supervision  
37 models in terms of developing advanced practitioners (**Table 3**):  
38  
39

### 40 Clinical supervision

- 41 • Participation in workplace activities and guided learning at work
- 42 • Workplace affordances
- 43
- 44

### 45 Educational supervision

- 46 • Ongoing support to help meet learning needs
- 47

48 An additional theme was identified from inductive data driven coding but did not map on to  
49 Billet's theory:

- 50 • Support offered for supervisors
- 51
- 52
- 53
- 54
- 55
- 56
- 57
- 58
- 59
- 60

**Table 3: Mapping of themes against components of Billet's theory**

| Components of Billet's theory of workplace pedagogy    | Theme(s)                                                                                                                                                                                                      |
|--------------------------------------------------------|---------------------------------------------------------------------------------------------------------------------------------------------------------------------------------------------------------------|
| Learning through undertaking everyday work activities  | <ul style="list-style-type: none"> <li>• Participation in workplace activities and guided learning at work</li> </ul>                                                                                         |
| Opportunities to participate, observe and listen       |                                                                                                                                                                                                               |
| Use of modelling, coaching and scaffolding             |                                                                                                                                                                                                               |
| Use of techniques to develop understanding             | <ul style="list-style-type: none"> <li>• Participation in workplace activities and guided learning at work</li> <li>• Ongoing support to help meet learning needs</li> </ul>                                  |
| Opportunities to access goals required for performance | <ul style="list-style-type: none"> <li>• Workplace affordances</li> <li>• Ongoing support to help meet learning needs</li> </ul>                                                                              |
| Close guidance by experienced workers                  | <ul style="list-style-type: none"> <li>• Participation in workplace activities and guided learning at work</li> <li>• Workplace affordances</li> <li>• Ongoing support to help meet learning needs</li> </ul> |
|                                                        | <ul style="list-style-type: none"> <li>• Support offered for supervisors*</li> </ul>                                                                                                                          |

\*Additional theme identified from inductive data driven coding but did not map on to Billet's theory.

### **Clinical supervision**

#### **Participation in workplace activities and guiding learning at work**

Billet highlights the importance of supervisees being provided with opportunities to observe and participate in workplace activities and receive guidance from supervisors as well as experienced co-workers. This was reflected in learners' accounts regarding their experiences of clinical supervision. Those who portrayed supervision as a beneficial source of support typically described clinical supervision as an opportunity to shadow, be observed by, and receive feedback from an experienced clinician. Learners described having protected time to undertake learning within the workplace, often supported or facilitated by colleagues, and undertaken in conjunction with their supervisor.

*“what she [supervisor] would do is just take me through, before a case came in, she would take me through her thought process of what she thought and expected. And then you'd see during the consultation how things change and how things develop. And then we'd debrief afterwards..., it helped that learning experience and then we'd discuss it afterwards and identify anything that I wanted*



1  
2  
3 *to work on further or anything in my portfolio that I had to get experience, to tick*  
4 *off that competency." (Pharmacist learner; IUC.136)*  
5

6 Billet refers to guided learning as "a more experienced co-worker (the mentor) using  
7 *techniques and strategies to guide and monitor the development of the knowledge of those*  
8 *who are less skilful (the mentees)".<sup>42</sup> Guided learning was an essential component of the*  
9 *clinical supervisory role. Clinical supervisors typically conceptualised their role in terms of*  
10 *supporting learners to develop proficiency and confidence with regards to translating and*  
11 *applying the knowledge and skills they were gaining into their clinical practice.*  
12

13  
14 *"...it's about practical application of what they learn through, you know, reading or*  
15 *on study days or through their discussion groups. The course needs to put in a*  
16 *foundation of clinical knowledge that we can then apply, on the one hand almost*  
17 *patient by patient because it's a very patient focused service in real terms, but*  
18 *equally, it's also about the clinical confidence..." (Clinical supervisor; MOCH.502)*  
19

20  
21 Several clinical supervisors highlighted their role in supporting learners to overcome initial  
22 challenges, including a lack of established professional networks and information governance  
23 agreements between organisations. This included supporting learners to understand and  
24 orientate themselves within their practice environments whilst navigating the relational and  
25 structural aspects of their new role and work environments:  
26

27  
28 *"...it's an enabling role, I think it's somebody who, I think more of this is about*  
29 *relationships and actually facilitating and navigating these individuals to embed*  
30 *them locally. And when we are talking about primary care and integrated care,*  
31 *actually making that as seamless as possible for them to do that." (Clinical*  
32 *supervisor; MOCH.500)*  
33

34 Supervisors frequently described facilitating critical reflection as a key element of their role:

35  
36 *"...it's all about encouraging people isn't it? And making sure that they're aware of*  
37 *their own working practices, making sure that they're aware, what their strengths*  
38 *and their own weaknesses are, so that they can regulate themselves a little bit*  
39 *more." (Work-based supervisor; ACPT.203)*  
40

41 Signposting learners to other sources of relevant support was additionally referenced as a  
42 means of enabling learners to progress their learning and expand their support networks.  
43

44 *"I've had lots of discussions about trying to enable those individuals to get what*  
45 *they need, and it's not always from me, but actually from a number of different*  
46 *individuals, depending on what the nature of the problem of the challenge is that*  
47 *has presented itself." (Clinical supervisor; MOCH.500)*  
48

49 Learners on different pathways valued support from the wider team (particularly other  
50 pharmacists) to ease their transition into new advanced roles. However, some  
51 learners thought that teamwork and collaboration between pharmacy teams and  
52 wider healthcare professionals still needed improvement.  
53

54 *"Because naturally in the team previously I think pharmacists have been the ones*  
55 *doing the medication, main medication review and when it gets, you know, and it's*  
56 *like, oh technicians do that bit whereas now we're becoming more as a team... so*  
57 *sometimes there is a bit of resistance, a bit of natural resistance because people*  
58 *fear the unknown." (Pharmacy technician learner; MOCH.104)*  
59  
60

### Workplace affordances

Billet describes “workplace affordances” as the way the workplace shapes learning by providing learners access to activities and the direct and indirect guidance that individuals are able to access at the workplace.<sup>39</sup> In this study, clinical supervisors who also acted as learners’ line managers were a good fit as they were frequently able to offer a combination of regular pre-arranged face-to-face meetings alongside the opportunity for more ad hoc contact as and when learners felt this was needed.

On the other hand, several learners felt their clinical supervisors were mismatched to their needs. Reasons that learners felt this ranged from supervisors lacking relevant experience, to being located geographically far away and lacking understanding of the role or course. These factors / conditions led to a lack of affordances:

*“because the person [supervisor] hadn’t done the course themselves and had only had the training that’s offered, didn’t understand a lot of what had to be done and things and relied very heavily on me explaining to her, so I think that the training was obviously lacking.” (Pharmacist learner; MOCH. 109)*

Lack of proximity to the learner also created challenges in respect of observing learners’ practice and assessing competencies.

*“I think the idea of the clinical supervisor would be that you are spending time directly with that individual during their clinical practice and some of the physical examination assessments and observing those, you know, the way in which the assessments were structured and the criteria were put in place that I just couldn’t fulfil the role that was described, I think that’s the way to put it, because of the lack of capacity that I had really.” (Clinical supervisor; MOCH.502)*

Workplace affordances were not solely derived from the supervisor. The delegation of observation and assessment responsibilities to others was frequently cited as a means of overcoming challenges regarding capacity and geographical spread.

*“Well we managed to work round it by very kind nurses and doctors working alongside him [clinical supervisor] to get us signed off for all the bits that needed to be signed off and they supervised us.” (Pharmacist learner; MOCH.115)*

Utilising the skills and expertise across the workplace was beneficial to learners. Learners who described receiving clinical supervision from other types of health care professionals, particularly those receiving supervision from GPs and nurses, tended to describe the experience positively.

*“The organisation helped me shadow different GPs and different nurse practitioners to get a good flavour of the different kinds of consultation styles and different kinds of cases that you’d be dealing with. Because a nurse practitioner will deal with different things than a GP sometimes and handle them in a different way.” (Pharmacist learner; IUC.136)*

Issues with supervisor availability and expertise were less frequently encountered by ACPT learners who were all allocated a supervisor within their workplace which afforded them high accessibility, level of support and feedback.



1  
2  
3 *“Having the [work based] supervisor was quite handy because I always spoke to*  
4 *them. Whenever I worked there, they’re there, so I can speak to them and then they*  
5 *could guide me. They would see the way that I work as well and he will give me the*  
6 *improvements and guidance. They were very supportive.” (Pharmacy technician*  
7 *learner; ACPT.151)*  
8  
9

## 10 **Educational supervision**

### 11 Ongoing support to help meet learning needs

12  
13  
14 Educational supervision offered a way to fill some of the gaps where local clinical supervision  
15 was not available, and in settings like community pharmacy where learners did not have  
16 access to clinical/ work-based supervision at all, yet still needed support. Educational  
17 supervisors characterised their role in terms of supporting learners to identify their learning  
18 needs and the requirements of the learning pathway, and then as an ongoing available source  
19 of support in relation to any personal or academic challenges that learners encountered as  
20 they progressed through a pathway. Setting realistic and manageable aims and objectives  
21 with learners was described as a key component of the educational supervisor role.  
22  
23

24 *“...it’s having that initial meeting over the telephone, or even in person with the*  
25 *student, to really develop a development plan and their learning needs analysis,*  
26 *because we want to find out initially, because we need to plan ahead, what their*  
27 *backgrounds are, what their aims are, what they want to achieve and between us*  
28 *we come with objectives and realistic objectives, because a lot of people think*  
29 *coming here expecting one thing, when in reality it’s completely different”*  
30 *(Educational supervisor; post registration pathway.200)*  
31  
32

33 For some learners, educational supervision appeared to be structured and readily available.  
34 These learners discussed receiving frequent structured reviews that were planned in advance.  
35 On the contrary, some learners described the educational supervision that was available as  
36 being largely learner-led. These learners felt they would have benefited from more proactive  
37 support from their supervisors.  
38

### 39 Support offered for supervisors

40  
41 When asked about support or training received for supervision, some supervisors described  
42 feeling well supported in their role. This was attributed to having access to other supervisors  
43 with vast experience for support as well as wider networks. Other supervisors often reported  
44 feeling largely unsupported in their supervisory role, particularly those that supported learners  
45 who were not based within a service that they managed. Suggestions for additional support  
46 included face-to-face supervisor training sessions, and additional structure and clarity around  
47 expectations and monitoring associated with the role.  
48  
49

50 *“...going forward, we probably want to put in some kind of face-to-face clinical*  
51 *supervisor training session or contact session.” (Clinical supervisor; MOCH.500)*  
52  
53  
54

## 55 **Discussion**

56  
57 Drawing on qualitative data from a wider mixed methods evaluation of PhIF learning pathways,  
58 this paper explored pharmacy learners’ and their supervisors’ views on supervision models  
59 which can contribute to the development of advanced practitioners. Using Billet’s theory of  
60

workplace pedagogy as an interpretive framework enabled an understanding of the mechanisms facilitating effective supervision. Findings from this study should be considered in future policy interventions relevant for enhancing the education and training of advanced practitioners.

Participants in this study drew out important elements for effective supervision of advanced practitioners highlighting key workplace pedagogic practices such as: supporting learners to identify their learning needs (setting realistic and manageable aims and objectives); guided learning at work (i.e. opportunity to shadow, be observed by, and receive feedback from an experienced clinician), combination of regular pre-arranged face-to-face meetings and ad hoc contact when needed; along with ongoing support as learners' progressed through a learning pathway. These findings are consistent with studies on supervision in medical and nursing education, where setting clear goals and actions to achieve learning outcomes; facilitating learners' participation in workplace activities; providing regular ongoing feedback; and responsive support facilitate personal and professional development for learners.<sup>43-45</sup>

The educational and clinical supervisory roles in this study were described as complementary, offering distinct but connected contributions to learning, with clinical supervisors aiming to support learners to apply their learning in practice and educational supervisors focusing on supporting learners to navigate the requirements of a learning pathway. These findings complement existing research and guidance in medicine and nursing around the roles of clinical and educational supervision.<sup>11 13</sup> However, our evaluation highlighted that supervision needs to be more consistent in terms of supervisors' availability and accessibility, knowledge and experience, and level of support.

Achieving effective supervision requires a flexible approach to supervision suited to local circumstances and context of the setting. Important considerations involve having clinical supervisors in practice settings with good proximity, good understanding and experience of working in the setting. Our findings highlighted that importance of trainees utilising the skills and expertise across the workplace. Hence, it is beneficial for learners to have clinical supervision from different professions to support the breadth of development necessary across all areas of advanced practice. Advanced practitioners come from a range of professions and there will be some overlap in roles and responsibilities across different professions. This was gleaned from learner accounts in this study, where learners receiving some form of clinical supervision from other types of health care professionals tended to describe the experience positively as they developed a broader understanding of how different professions provide patient care. Such multi-professional approaches are common in training of medical students<sup>46</sup>.

In addition to clinical supervision focusing on specific individual learning needs in the workplace, more formative educational supervision is needed to identify learning needs, provide continuous and responsive support with a focus on guiding learners' development from single sector healthcare professionals to cross-sector healthcare professionals. Educational supervisors in this study also offered a way to fill in some of the gaps where there was a lack of local clinical supervision, and in settings like community pharmacy where pharmacist learners did not have access to clinical supervision at all – where they are otherwise isolated and relatively unsupported.<sup>47</sup> There may also be a role for an arms-length clinical mentor, who has the clinical knowledge but does not work close by – particularly in situations where learners work in isolation (e.g. community pharmacy). Structured mentoring programmes have been implemented to facilitate specific career-advancement of healthcare

professionals (mainly nurses) where reported benefits are consolidation of the mentees' professional and social skills, increased self-confidence, improved communication skills leadership development, and succession planning.<sup>48 49</sup>

Our findings also highlight the need for developing a flexible healthcare workforce with supervision skills in a variety of settings so they can meet the needs of the learners, where advanced practice and behaviour and practice change are the goal. Training and support for supervision should include a range of flexible supervision models/styles which can be adapted by supervisors to facilitate interaction and ensure continuity regardless of setting. These models should be underpinned by an integrated approach to supervision which recognises communication pathways between different type of supervisors and other means of support (e.g. mentors, line managers etc.) involved within the learner's training and education pathway.<sup>50 51</sup> Supervisors also need organisational support to facilitate their professional development and balance supervision duties with daily practice.<sup>23</sup>

It is also advisable that healthcare professionals from different disciplines are made aware of the professional role and capabilities of learners to offset challenges with professional identity formation and adjustment in new workplace settings.<sup>52</sup> Findings from this study suggest that having a more experienced healthcare professional in the workplace from the same discipline as the learner could help facilitate development of the trainees' professional identity. Interprofessional education and training in the workplace are also other means which can enhance professional identity formation and a collaborative approach to patient care<sup>53-55</sup>

Our study limitations include self-selection, self-reporting, social desirability and recall bias making findings more positive. Any potential bias that could occur due to two of the authors being pharmacists was mitigated as those conducting and analysing the interviews were not pharmacists. Another limitation is that there were only five clinical and five educational supervisors. In addition, all the educational supervisors which participated in our study were from the post-registration learning pathway which limited the depth of findings on educational supervision. Nonetheless, views of learners from other learning pathways (although limited) helped us gather some insights on the role of clinical and educational supervision across the board.

## Conclusion

Using educational theory, this study highlights important considerations for effective supervision of pharmacy learners in advanced practitioner roles. These include supporting learners to identify their learning needs (ES), guiding learners in everyday work activities (CS), combination of regular pre-arranged face-to-face meetings and ad hoc contact when needed (CS), along with ongoing support as learners progressed through a learning pathway (ES). Insights from this study can inform the education and training of advanced practitioners from different professions to support healthcare workforce development and integrated multi-disciplinary working in different healthcare settings. Future research should focus on developing models which encourage interprofessional supervision and mentoring to support development of advanced practitioners in different settings and to aid with supervisory capacity in the existing workforce.

**Funding statement:** This work was funded by NHS England Pharmacy Integration Fund (J30302195).

**Competing interest:** None

**Acknowledgements:** We would like to thank NHS England Pharmacy Integration Fund for funding the evaluation. We would also like to thank all participants who took part in the interviews.

**Contributors:** JA, SS, CF were responsible for data collection. JA, SS and CF coded and analysed the interview transcripts which was overseen by SJ with input from EIS. AH was responsible for applying educational theory to interpret the data analysis which was overseen by SW with input from EIS, SJ, IM, ES and AM. AH drafted the manuscript, which EIS, SW, SJ, JA, IM, ES, SS, CF and AM commented on and edited. The final manuscript was read and approved by all authors.

**Ethics Approval:** This study received ethics approval by The University of Manchester Research Ethics Committee (Ref no. 2019-7358-12719). Written or verbal consent to participate in the study was obtained from each participant prior to starting data collection.

**Patient consent form:** N/A

**Data sharing statement:** The datasets generated and/or analysed during the current study are not publicly available due to protection of participant confidentiality.

## References

1. Buchan J, Campbell J. Challenges posed by the global crisis in the health workforce. *BMJ* 2013;347
2. NHS. Interim NHS People Plan, 2019. Available: [https://www.longtermplan.nhs.uk/wp-content/uploads/2019/05/Interim-NHS-People-Plan\\_June2019.pdf](https://www.longtermplan.nhs.uk/wp-content/uploads/2019/05/Interim-NHS-People-Plan_June2019.pdf) [Accessed 01 Sept 2021].
3. NHS. The NHS Long Term Plan 2019. Available: <https://www.longtermplan.nhs.uk/wp-content/uploads/2019/01/nhs-long-term-plan-june-2019.pdf> [Accessed 01 Sept 2021]
4. Nancarrow SA. Six principles to enhance health workforce flexibility. *Hum Resour Health* 2015;13:9.
5. Fulton BD, Scheffler RM, Sparkes SP, et al. Health workforce skill mix and task shifting in low income countries: a review of recent evidence. *Hum Resour Health* 2011;9:1.
6. Dalton K, Byrne S. Role of the pharmacist in reducing healthcare costs: current insights. *Integr Pharm Res Pract* 2017;6:37-46.
7. Koehler T, Brown A. Documenting the evolution of the relationship between the pharmacy support workforce and pharmacists to support patient care. *Res Social Adm Pharm* 2017;13(2):280-85.

- 1  
2  
3 8. Kroezen M, van Dijk L, Groenewegen PP, et al. Nurse prescribing of medicines in Western  
4 European and Anglo-Saxon countries: a systematic review of the literature. *BMC*  
5 *Health Serv Res* 2011;11:127.  
6
- 7 9. Buchan J, Charlesworth A, Gershlick B, et al. A critical moment: NHS staffing trends,  
8 retention and attrition. The Health Foundation 2019.  
9
- 10 10. de Bont A, van Exel J, Coretti S, et al. Reconfiguring health workforce: a case-based  
11 comparative study explaining the increasingly diverse professional roles in Europe.  
12 *BMC Health Serv Res* 2016;16(1):637.  
13
- 14 11. Kilminster S. Understanding the Nature and Purpose of Clinical and Educational  
15 Supervision. *InnovAiT* 2010;3(10):615-18.  
16
- 17 12. Clark P, Jamieson A, Launer J, et al. Intending to be a supervisor, mentor or coach? Which,  
18 what for and why? *Educ Prim Care* 2006;17(2):109-16.  
19
- 20 13. Kilminster S, Cottrell D, Grant J, et al. AMEE Guide No. 27: Effective educational and clinical  
21 supervision. *Med Teach* 2007;29(1):2-19.  
22
- 23 14. Dornan T, Boshuizen H, King N, et al. Experience-based learning: a model linking the  
24 processes and outcomes of medical students' workplace learning. *Med Educ*  
25 2007;41(1):84-91.  
26
- 27 15. Teunissen PW, Stapel DA, Scheele F, et al. The influence of context on residents'  
28 evaluations: effects of priming on clinical judgment and affect. *Adv Health Sci Educ*  
29 *Theory Pract* 2009;14(1):23-41.  
30
- 31 16. Clement T, Brown J, Morrison J, et al. Ad hoc supervision of general practice registrars as  
32 a 'community of practice': analysis, interpretation and re-presentation. *Adv Health Sci*  
33 *Educ Theory Pract* 2016;21(2):415-37.  
34
- 35 17. Weallans J, Roberts C, Hamilton S, et al. Guidance for providing effective feedback in  
36 clinical supervision in postgraduate medical education: a systematic review. *Postgrad*  
37 *Med J* 2021; 2020-139566.  
38
- 39 18. Howard V, Eddy-Imishue GK. Factors influencing adequate and effective clinical  
40 supervision for inpatient mental health nurses' personal and professional  
41 development: An integrative review. *J Psychiatr Ment Health Nurs* 2020;27(5):640-56.  
42
- 43 19. Donough G, Van der Heever M. Undergraduate nursing students' experience of clinical  
44 supervision. *Curationis* 2018;41(1):e1-e8.  
45
- 46 20. Bifarin O, Stonehouse D. Clinical supervision: an important part of every nurse's practice.  
47 *Br J Nurs* 2017;26(6):331-35.  
48
- 49 21. Milne D, Aylott H, Fitzpatrick H, et al. How Does Clinical Supervision Work? Using a "Best  
50 Evidence Synthesis" Approach to Construct a Basic Model of Supervision. *Clin Superv*  
51 2008;27(2):170-90.  
52
- 53 22. Hindi AMK, Willis SC, Schafheutle EI. Using communities of practice as a lens for exploring  
54 experiential pharmacy learning in general practice: Are communities of practice the  
55 way forward in changing the training culture in pharmacy? *BMC Med Educ.*  
56 2022;22(1):12.  
57  
58  
59  
60



23. Snowdon DA, Sargent M, Williams CM, et al. Effective clinical supervision of allied health professionals: a mixed methods study. *BMC Health Serv Res* 2019;20(1):2.
24. Sirola-Karvinen P, Hyrkas K. Clinical supervision for nurses in administrative and leadership positions: a systematic literature review of the studies focusing on administrative clinical supervision. *J Nurs Manag* 2006;14(8):601-9.
25. Abdulla A. Educational supervision: a new challenge. *J R Soc Med* 2008;101(1):6.
26. Patel P. An evaluation of the current patterns and practices of educational supervision in postgraduate medical education in the UK. *Perspect Med Educ* 2016;5(4):205-14.
27. NHS England. Pharmacy Integration Fund Briefing 2021. Available: <https://www.england.nhs.uk/wp-content/uploads/2016/11/pharmacy-integration-fund-briefing.pdf> [Accessed 04 Sept 2021].
28. Magola E, Willis SC, Schafheutle EI. The development, feasibility and acceptability of a coach-led intervention to ease novice community pharmacists' transition to practice. *Res Social Adm Pharm* 2021;S1551-7411(21)00119-4.
29. Schafheutle EI, Jee SD, Willis SC. The influence of learning environment on trainee pharmacy technicians' education and training experiences. *Res Social Adm Pharm* 2018;14(11):1020-26.
30. Jee SD, Schafheutle EI, Noyce PR. Using longitudinal mixed methods to study the development of professional behaviours during pharmacy work-based training. *Health Soc Care Community* 2017;25(3):975-86.
31. Schafheutle EI, Jee SD, Willis SC. Fitness for purpose of pharmacy technician education and training: The case of Great Britain. *Res Social Adm Pharm* 2017;13(1):88-97.
32. Jee SD, Schafheutle EI, Noyce PR. Exploring the process of professional socialisation and development during pharmacy pre-registration training in England. *Int J Pharm Pract* 2016;24(4):283-93.
33. Nelson PA, Bradley F, Martindale A-M, et al. Skill-mix change in general practice: a qualitative comparison of three 'new' non-medical roles in English primary care. *Br J Gen Pract* 2019;69(684):e489-e98.
34. NHS Health Education England. Health Education England: Advanced Practice 2021. Available from: <https://advanced-practice.hee.nhs.uk/> [Accessed 04 Sept 2021].
35. NHS England. Medicines optimisation in care homes, 2018. Available: <https://www.england.nhs.uk/wp-content/uploads/2018/03/medicines-optimisation-in-care-homes-programme-overview.pdf> [Accessed 04 Sept 2021].
36. NHS England. Integrating pharmacy into urgent care 2021. Available: <https://www.england.nhs.uk/primary-care/pharmacy/urgent-care/> [Accessed 04 Sept 2021]
37. Quaye S. Accuracy checking pharmacy technician (ACPT) handbook. Available: [https://www.cppe.ac.uk/wizard/files/developing\\_career/acpt%20handbook.pdf](https://www.cppe.ac.uk/wizard/files/developing_career/acpt%20handbook.pdf) [Accessed 04 Sept 2021]

- 1
- 2
- 3
- 4 38. PSNC. Post-Registration Training for Community Pharmacists 2021. Available:  
5 [https://psnc.org.uk/the-healthcare-landscape/the-pharmacy-integration-fund-](https://psnc.org.uk/the-healthcare-landscape/the-pharmacy-integration-fund-phif/post-registration-training-for-community-pharmacists/)  
6 [phif/post-registration-training-for-community-pharmacists/](https://psnc.org.uk/the-healthcare-landscape/the-pharmacy-integration-fund-phif/post-registration-training-for-community-pharmacists/) [Accessed 04 Sept 2021]
- 7
- 8 39. Billett S. Toward a Workplace Pedagogy: Guidance, Participation, and Engagement. *Adult*  
9 *Educ Q* 2002;53(1):27-43.
- 10
- 11 40. Fereday J, Muir-Cochrane E. Demonstrating Rigor Using Thematic Analysis: A Hybrid  
12 Approach of Inductive and Deductive Coding and Theme Development. *Int J Qual*  
13 *2006;5(1):80-92.*
- 14
- 15 41. Gioia DA, Corley KG, Hamilton AL. Seeking Qualitative Rigor in Inductive Research: Notes  
16 on the Gioia Methodology. *Organ Res Methods* 2012;16(1):15-31.
- 17
- 18 42. Billett S. Guided learning at work. *J Workplace Learn* 2000;12(7):272-85.
- 19
- 20 43. Wong LCJ, Wong PTP, Ishiyama FI. What Helps and What Hinders in Cross-Cultural Clinical  
21 Supervision: A Critical Incident Study. *The Counseling Psychologist* 2012;41(1):66-85.
- 22
- 23 44. Bogo M, Paterson J, Tufford L, et al. Interprofessional Clinical Supervision in Mental Health  
24 and Addiction: Toward Identifying Common Elements. *Clin Superv* 2011;30(1):124-40.
- 25
- 26 45. Jackson D, Davison I, Adams R, et al. A systematic review of supervisory relationships in  
27 general practitioner training. *Medical education* 2019;53(9):874-85.
- 28
- 29 46. General Medical Council. The state of medical education and practice in the UK, 2020.  
30 Available:[https://www.gmc-uk.org/-/media/documents/somep-2020\\_pdf-](https://www.gmc-uk.org/-/media/documents/somep-2020_pdf-84684244.pdf?la=en&hash=F68243A899E21859AB1D31866CC54A0119E60291)  
31 [84684244.pdf?la=en&hash=F68243A899E21859AB1D31866CC54A0119E60291](https://www.gmc-uk.org/-/media/documents/somep-2020_pdf-84684244.pdf?la=en&hash=F68243A899E21859AB1D31866CC54A0119E60291)  
32 [Accessed: 08 Sept 2021].
- 33
- 34 47. Magola E, Willis SC, Schafheutle EI. Community pharmacists at transition to independent  
35 practice: Isolated, unsupported, and stressed. *Health Soc Care Community*  
36 *2018;26(6):849-59.*
- 37
- 38 48. Dopson SA, Griffey S, Ghiya N, et al. Structured Mentoring for Workforce Engagement and  
39 Professional Development in Public Health Settings. *Health Promot Pract*  
40 *2017;18(3):327-31.*
- 41
- 42 49. Buddeberg-Fischer B, Herta KD. Formal mentoring programmes for medical students and  
43 doctors--a review of the Medline literature. *Med Teach* 2006;28(3):248-57.
- 44
- 45 50. Grant J, Schofield MJ, Crawford S. Managing difficulties in supervision: supervisors'  
46 perspectives. *J Couns Psychol* 2012;59(4):528-41.
- 47
- 48 51. Rothwell C, Kehoe A, Farook SF, et al. Enablers and barriers to effective clinical supervision  
49 in the workplace: a rapid evidence review. *BMJ Open* 2021;11(9):e052929.
- 50
- 51 52. Ibarra H, Barbulescu R. Identity as narrative: Prevalence, effectiveness, and consequences  
52 of narrative identity work in macro work role transitions. *Acad Manag Rev*  
53 *2010;35(1):135-54*
- 54
- 55
- 56
- 57 53. Langendyk V, Hegazi I, Cowin L, et al. Imagining alternative professional identities:  
58 reconfiguring professional boundaries between nursing students and medical  
59 students. *Acad Med* 2015;90(6):732-7.
- 60



- 1  
2  
3 54. Dickie R, Bartle DE, Jackman K, et al. Clinical supervisors' experiences of using an  
4 interprofessional clinical supervision model in an acute care setting. *J Interprof Care*  
5 2019;33(6):812-15  
6  
7 55. Chipchase L, Allen S, Eley D, et al. Interprofessional supervision in an intercultural context:  
8 a qualitative study. *J Interprof Care* 2012;26(6):465-71.  
9  
10  
11  
12  
13  
14  
15  
16  
17  
18  
19  
20  
21  
22  
23  
24  
25  
26  
27  
28  
29  
30  
31  
32  
33  
34  
35  
36  
37  
38  
39  
40  
41  
42  
43  
44  
45  
46  
47  
48  
49  
50  
51  
52  
53  
54  
55  
56  
57  
58  
59  
60

For peer review only

## Consolidated criteria for reporting qualitative studies (COREQ): 32-item checklist

Developed from:

Tong A, Sainsbury P, Craig J. Consolidated criteria for reporting qualitative research (COREQ): a 32-item checklist for interviews and focus groups. *International Journal for Quality in Health Care*. 2007. Volume 19, Number 6: pp. 349 – 357

**YOU MUST PROVIDE A RESPONSE FOR ALL ITEMS. ENTER N/A IF NOT APPLICABLE**

| No. Item                                       | Guide questions/description                                                                                                                              | Reported on Page #   |
|------------------------------------------------|----------------------------------------------------------------------------------------------------------------------------------------------------------|----------------------|
| <b>Domain 1: Research team and reflexivity</b> |                                                                                                                                                          |                      |
| <i>Personal Characteristics</i>                |                                                                                                                                                          |                      |
| 1. Interviewer/facilitator                     | Which author/s conducted the interview or focus group?                                                                                                   | Design (page 6)      |
| 2. Credentials                                 | What were the researcher's credentials?<br>E.g. PhD, MD                                                                                                  | Cover page (page 1)  |
| 3. Occupation                                  | What was their occupation at the time of the study?                                                                                                      | Cover page (page 1)  |
| 4. Gender                                      | Was the researcher male or female?                                                                                                                       | N/A                  |
| 5. Experience and training                     | What experience or training did the researcher have?                                                                                                     | Design (page 6)      |
| <i>Relationship with participants</i>          |                                                                                                                                                          |                      |
| 6. Relationship established                    | Was a relationship established prior to study commencement?                                                                                              | No                   |
| 7. Participant knowledge of the interviewer    | What did the participants know about the researcher? e.g. personal goals, reasons for doing the research                                                 | Design (page 6)      |
| 8. Interviewer characteristics                 | What characteristics were reported about the interviewer/facilitator? e.g. Bias, assumptions, reasons and interests in the research topic                | Discussion (page 12) |
| <b>Domain 2: study design</b>                  |                                                                                                                                                          |                      |
| <i>Theoretical framework</i>                   |                                                                                                                                                          |                      |
| 9. Methodological orientation and Theory       | What methodological orientation was stated to underpin the study? e.g. grounded theory, discourse analysis, ethnography, phenomenology, content analysis | Design (page 6)      |
| <i>Participant selection</i>                   |                                                                                                                                                          |                      |
| 10. Sampling                                   | How were participants selected? e.g. purposive, convenience, consecutive, snowball                                                                       | Design (page 6)      |
| 11. Method of approach                         | How were participants approached? e.g. face-to-face, telephone, mail, email                                                                              | Design (page 6)      |
| 12. Sample size                                | How many participants were in the study?                                                                                                                 | Design (page 6)      |

|                                        |                                                                                                                                 |                                                                                                                                              |
|----------------------------------------|---------------------------------------------------------------------------------------------------------------------------------|----------------------------------------------------------------------------------------------------------------------------------------------|
| 13. Non-participation                  | How many people refused to participate or dropped out? Reasons?                                                                 | N/A                                                                                                                                          |
| <i>Setting</i>                         |                                                                                                                                 |                                                                                                                                              |
| 14. Setting of data collection         | Where was the data collected? e.g. home, clinic, workplace                                                                      | N/A (Telephone interviews)                                                                                                                   |
| 15. Presence of non-participants       | Was anyone else present besides the participants and researchers?                                                               | N/A                                                                                                                                          |
| 16. Description of sample              | What are the important characteristics of the sample? e.g. demographic data, date                                               | Design (page 6)                                                                                                                              |
| <i>Data collection</i>                 |                                                                                                                                 |                                                                                                                                              |
| 17. Interview guide                    | Were questions, prompts, guides provided by the authors? Was it pilot tested?                                                   | Design (page 6)                                                                                                                              |
| 18. Repeat interviews                  | Were repeat interviews carried out? If yes, how many?                                                                           | N/A                                                                                                                                          |
| 19. Audio/visual recording             | Did the research use audio or visual recording to collect the data?                                                             | Design (page 6)                                                                                                                              |
| 20. Field notes                        | Were field notes made during and/or after the interview or focus group?                                                         | Design (page 6)                                                                                                                              |
| 21. Duration                           | What was the duration of the interviews or focus group?                                                                         | Design (page 6)                                                                                                                              |
| 22. Data saturation                    | Was data saturation discussed?                                                                                                  | Design (page 6)                                                                                                                              |
| 23. Transcripts returned               | Were transcripts returned to participants for comment and/or correction?                                                        | N/A                                                                                                                                          |
| <b>Domain 3: analysis and findings</b> |                                                                                                                                 |                                                                                                                                              |
| <i>Data analysis</i>                   |                                                                                                                                 |                                                                                                                                              |
| 24. Number of data coders              | How many data coders coded the data?                                                                                            | Contributors (page 12)                                                                                                                       |
| 25. Description of the coding tree     | Did authors provide a description of the coding tree?                                                                           | N/A                                                                                                                                          |
| 26. Derivation of themes               | Were themes identified in advance or derived from the data?                                                                     | Design (page 6-7)                                                                                                                            |
| 27. Software                           | What software, if applicable, was used to manage the data?                                                                      | NVivo mentioned in page 6                                                                                                                    |
| 28. Participant checking               | Did participants provide feedback on the findings?                                                                              | N/A (contact details for participants had to be removed after completion of interviews to comply with university research ethics regulation) |
| <i>Reporting</i>                       |                                                                                                                                 |                                                                                                                                              |
| 29. Quotations presented               | Were participant quotations presented to illustrate the themes/findings? Was each quotation identified? e.g. participant number | Results (pages 7-10)                                                                                                                         |
| 30. Data and findings consistent       | Was there consistency between the data presented and the findings?                                                              | Discussion (pages 14-16)                                                                                                                     |

|                             |                                                                        |                                                                            |
|-----------------------------|------------------------------------------------------------------------|----------------------------------------------------------------------------|
| 31. Clarity of major themes | Were major themes clearly presented in the findings?                   | Results (pages 6-10)                                                       |
| 32. Clarity of minor themes | Is there a description of diverse cases or discussion of minor themes? | Results: Additional theme which did not map on to theory (page 7/ Table 3) |

Once you have completed this checklist, please save a copy and upload it as part of your submission. When requested to do so as part of the upload process, please select the file type: *Checklist*. You will NOT be able to proceed with submission unless the checklist has been uploaded. Please DO NOT include this checklist as part of the main manuscript document. It must be uploaded as a separate file.
